# Supplementary material
Source: ML conference proceedings conference paper supplement (https://proceedings.neurips.cc/paper_files/paper/2019/hash/3c7417b8df0daf23f39f445e740c7a43-Abstract.html)
Supplement: Supplementary file [file 3c7417b8df0daf23f39f445e740c7a43-Supplemental.zip]

---

# Interaction Hard Thresholding: Consistent Sparse Quadratic Regression in Sub-quadratic Time and Space

---

**Shuo Yang \***

Department of Computer Science  
University of Texas at Austin  
Austin, TX 78712  
yangshuo\_ut@utexas.edu

**Yanyao Shen \***

ECE Department  
University of Texas at Austin  
Austin, TX 78712  
shenyanyao@utexas.edu

**Sujay Sanghavi**

ECE Department  
University of Texas at Austin  
Austin, TX 78712  
sanghavi@mail.utexas.edu

## Abstract

Quadratic regression involves modeling the response as a (generalized) linear function of not only the features  $\mathbf{x}^j$ , but also of quadratic terms  $\mathbf{x}^{j_1} \mathbf{x}^{j_2}$ . The inclusion of such higher-order “interaction terms” in regression often provides an easy way to increase accuracy in already-high-dimensional problems. However, this explodes the problem dimension from linear  $O(p)$  to quadratic  $O(p^2)$ , and it is common to look for sparse interactions (typically via heuristics).

In this paper we provide a new algorithm – Interaction Hard Thresholding (IntHT) – which is the first one to provably accurately solve this problem in *sub-quadratic* time and space. It is a variant of Iterative Hard Thresholding; one that uses the special quadratic structure to devise a new way to (approx.) extract the top elements of a  $p^2$  size gradient in sub- $p^2$  time and space.

Our main result is to theoretically prove that, in spite of the many speedup-related approximations, IntHT linearly converges to a consistent estimate under standard high-dimensional sparse recovery assumptions. We also demonstrate its value via synthetic experiments.

Moreover, we numerically show that IntHT can be extended to higher-order regression problems, and also theoretically analyze an SVRG variant of IntHT.

## 1 Introduction

Simple linear regression aims to predict a response  $y$  via a (possibly generalized) linear function  $\boldsymbol{\theta}^\top \mathbf{x}$  of the feature vector  $\mathbf{x}$ . **Quadratic regression** aims to predict  $y$  as a quadratic function  $\mathbf{x}^\top \boldsymbol{\Theta} \mathbf{x}$  of the features  $\mathbf{x}$

Linear Model

$$y \sim \boldsymbol{\theta}^\top \mathbf{x}$$

Quadratic Model

$$y \sim \mathbf{x}^\top \boldsymbol{\Theta} \mathbf{x}$$

The inclusion of such higher-order *interaction terms* – in this case second-order terms of the form  $\mathbf{x}^{j_1} \mathbf{x}^{j_2}$  – is common practice, and has been seen to provide much more accurate predictions in

---

\*equal contribution

several high-dimensional problem settings like recommendation systems, advertising, social network modeling and computational biology [23, 11, 3]. In this paper we consider quadratic regression with an additional (possibly non-linear) link function relating  $y$  to  $\mathbf{x}^\top \Theta \mathbf{x}$ .

One problem with explicitly adding quadratic interaction terms is that the dimension of the problem now goes from  $p$  to  $p^2$ . In most cases, the quadratic problem is high-dimensional and will likely overfit the data; correspondingly, it is common to implicitly / explicitly impose low-dimensional structure on the  $\Theta$  – with sparsity of  $\Theta$  being a natural choice. A concrete example for sparse interaction would be the genome-wide association study, where for a given phenotype, the associated genetic variants are usually a sparse subset of all possible variants. Those genes usually interact with each other and leads to the given phenotype [15].

The **naive approach** to solving this problem involves recasting this as a big linear model that is now in  $p^2$  dimensions, with the corresponding  $p^2$  features being all pairs of the form  $\mathbf{x}^{j_1} \mathbf{x}^{j_2}$ . However, this approach takes  $\Omega(p^2)$  time and space, since sparse linear regression cannot be done in time and space smaller than its dimension – which in this case is  $p^2$  – even in cases where statistical properties like restricted strong convexity / incoherence etc. hold. Fundamentally, the problem lies in the fact that one needs to compute a gradient of the loss, and this is an  $\Omega(p^2)$  operation.

**Our motivation:** Can we learn a sparse quadratic model with time and space complexity that is sub-quadratic? In particular, suppose we have data which is well modeled by a  $\Theta^*$  that is  $K$ -sparse, with  $K$  being  $\mathcal{O}(p^\gamma)$  and  $\gamma < 1$ . Statistically, this can be possibly recovered from  $\mathcal{O}(K \log p)$  samples, each of which is  $p$ -dimensional. Thus we have a setting where the input is sub-quadratic with size  $\mathcal{O}(Kp \log p)$ , and the final output is sub-quadratic with size  $\mathcal{O}(K)$ . Our aim is to have an algorithm whose time and space complexity is also sub-quadratic for this case.

**In this paper**, we develop a new algorithm which has this desired sub-quadratic complexity, and subsequently theoretically establish that it consistently recovers a sparse  $\Theta^*$ . We briefly overview our setting and results below.

## 1.1 Main Contributions

Given  $n$  samples  $\{(\mathbf{x}_i, y_i)\}_{i=1}^n$ , we are interested in minimizing the following loss function corresponding to a quadratic model:

$$\text{(Quadratic Structure)} \quad \min_{\Theta: \|\Theta\|_0 \leq K} \frac{1}{n} \sum_{i=0}^{n-1} f(\mathbf{x}_i^\top \Theta \mathbf{x}_i, y_i) \quad := F_n(\Theta) \quad (1)$$

We develop a **new algorithm** – Interaction Hard Thresholding (IntHT), outlined in **Algorithm 1** – for this problem, and provide a **rigorous proof of consistency** for it under the standard settings (Restricted strong convexity and smoothness of the loss) for which consistency is established for sparse recovery problems. At a high level, it is based on the following **key ideas**:

- (1) Because of the special quadratic structure, we show that the top  $2k$  entries of the gradient can be found in sub-quadratic time and space, using ideas from hashing and coding. The subroutine in Algorithm 2 for doing this is based on the idea of [21] and **Theorem 1** characterizes its performance and approximation guarantee.
- (2) We note a simple but key fact: in (stochastic) iterative hard thresholding, the new  $k$ -sparse  $\Theta_{t+1}$  that is produced has its support inside the union of two sets of size  $k$  and  $2k$ : the support of the previous  $\Theta_t$ , and the top- $2k$  elements of the gradient.
- (3) While we do not find the precise top- $2k$  elements of the gradient, we do find an approximation. Using a new theoretical analysis, we show that this approximate-top- $2k$  is still sufficient to establish linear convergence to a consistent solution. This is our main result, described in **Theorem 4**.
- (4) As an extension, we show that our algorithm also works with popular SGD variants like SVRG (**Algorithm 4 in Appendix B**), with provable linear convergence and consistency in **Appendix C**. We also demonstrate the extension of our algorithm to estimate higher order interaction terms with a numerical experiment in **Section 5**.

**Notation** We use  $[n]$  to represent the set  $\{0, \dots, n-1\}$ . We use  $f_B(\Theta)$  to denote the average loss on batch  $B$ , where  $B$  is a subset of  $[n]$  with batch size  $m$ . We define  $\langle \mathbf{A}, \mathbf{B} \rangle = \text{tr}(\mathbf{A}^\top \mathbf{B})$ , and  $\text{supp}(\mathbf{A})$

to be the index set of  $\mathbf{A}$  with non-zero entries. We let  $\mathcal{P}_S$  to be the projection operator onto the index set  $S$ . We use standard Big- $\mathcal{O}$  notation for time/space complexity analysis, and Big- $\tilde{\mathcal{O}}$  notation which ignores log factors.

## 2 Related Work

**Learning with high-order interactions** Regression with interaction terms has been studied in the statistics community. However, many existing results consider under the assumption of strong/weak hierarchical (SH/WH) structure: the coefficient of the interaction term  $\mathbf{x}^{j_1} \mathbf{x}^{j_2}$  is non-zero only when both coefficients of  $\mathbf{x}^{j_1}$  and  $\mathbf{x}^{j_2}$  are (or at least one of them is) non-zero. Greedy heuristics [32, 11] and regularization based methods [7, 3, 16, 25, 10] are proposed accordingly. However, they could potentially miss important signals that only contains the effect of interactions. Furthermore, several of these methods also suffer from scaling problems due to the quadratic scaling of the parameter size. There are also results considering the more general tensor regression, see, e.g., [34, 9], among many others. However, neither do these results focus on solutions with efficient memory usage and time complexity, which may become a potential issue when the dimension scales up. From a combinatorial perspective, [18, 13] learns sparse polynomial in Boolean domain using quite different approaches.

**Sparse recovery, IHT and stochastic-IHT** IHT [4] is one type of sparse recovery algorithms that is proved to be effective for M-estimation [12] under the regular RSC/RSM assumptions. [20] proposes and analyzes a stochastic version of IHT. [14, 26] further consider variance reduced acceleration algorithm under this high dimensional setting, [35] studies IHT in high dimensional setting with nonlinear measurement. Notice that IHT, if used for our quadratic problem, still suffers from quadratic space, similar to other techniques, e.g., the Lasso, basis pursuit, least angle regression [29, 6, 8]. On the other hand, [19] recently considers a variant of IHT, where for each sample, only a random subset of features is observed. This makes each update cheap, but their sample size has linear dependence on the ambient dimension, which is again quadratic. Apart from that, [20, 17] also show that IHT can potentially tolerate a small amount of error per iteration.

**Maximum inner product search** One key technique of our method is extracting the top elements (by absolute value) of gradient matrix, which can be expressed as the inner product of two matrices. This can be formulated as finding Maximum Inner Product (MIP) from two sets of vectors. In practice, algorithms specifically designed for MIP are proposed based on locality sensitive hashing [27], and many other greedy type algorithms [2, 33]. But they either can't fit into the regression setting, or suffers from quadratic complexity. In theory, MIP is treated as a fundamental problem in the recent development of complexity theory [1, 31]. [1, 5] shows the hardness of MIP, even for Boolean vectors input. While in general hard, there are data dependent approximation guarantees, using the compressed matrix multiplication method [21], which inspired our work.

**Others** The quadratic problem we study also share similarities with several other problem settings, including factorization machine [23] and kernel learning [24, 22]. Different from factorization machine, we do not require the input data to be sparse. While the factorization machine tries to learn a low rank representation, we are interested in learning a sparse representation. Compared to kernel learning, especially the quadratic / polynomial kernels, our task is to do feature selection and identify the correct interactions.

## 3 Interaction Hard Thresholding

We now describe the main ideas motivating our approach, and then formally describe the algorithm.

**Naively recasting as a linear model has  $p^2$  time and space complexity:** As a first step to our method, let us see what happens with the simplest approach. Specifically, as noted before, problem (1) can be recast as one of finding a sparse (generalized) linear model in the  $p^2$  size variable  $\Theta$ :

$$\text{(Recasting as linear model)} \quad \min_{\Theta: \|\Theta\|_0 \leq K} \frac{1}{n} \sum_{i=0}^{n-1} f(\langle \mathbf{X}_i, \Theta \rangle, y_i)$$

where matrix  $\mathbf{X}_i := \mathbf{x}_i \mathbf{x}_i^\top$ . Iterative hard thresholding (IHT) [4] is a state-of-the-art method (both in terms of speed and statistical accuracy) for such sparse (generalized) linear problems. This involves

---

**Algorithm 1** INTERACTION HARD THRESHOLDING (INTHT)

---

- 1: **Input:** Dataset  $\{\mathbf{x}_i, y_i\}_{i=1}^n$ , dimension  $p$
  - 2: **Parameters:** Step size  $\eta$ , estimation sparsity  $k$ , batch size  $m$ , round number  $T$
  - 3: **Output:** The parameter estimation  $\hat{\Theta}$
  - 4: Initialize  $\Theta^0$  as a  $p \times p$  zero matrix.
  - 5: **for**  $t = 0$  **to**  $T - 1$  **do**
  - 6:   Draw a subset of indices  $\mathcal{B}_t$  from  $[n]$  randomly.
  - 7:   Calculate the residual  $u_i = u(\Theta^t, \mathbf{x}_i, y_i)$  based on eq. (2), for every  $i \in \mathcal{B}_t$ .
  - 8:   Set  $\mathbf{A}_t \in \mathbb{R}^{p \times m}$ , where each column of  $\mathbf{A}_t$  is  $u_i \mathbf{x}_i$ ,  $i \in \mathcal{B}_t$ .
  - 9:   Set  $\mathbf{B}_t \in \mathbb{R}^{p \times m}$ , where each column of  $\mathbf{B}_t$  is  $\mathbf{x}_i$ ,  $i \in \mathcal{B}_t$ . (where  $\frac{\mathbf{A}_t \mathbf{B}_t^\top}{m}$  gives the gradient)
  - 10:   Compute  $\tilde{S}_t = \text{ATEE}(\mathbf{A}_t, \mathbf{B}_t, 2k)$ .   —/\* approximate top elements extraction \*/—
  - 11:   Set  $S_t = \tilde{S}_t \cup \text{supp}(\Theta^t)$ .   —/\* inaccurate hard thresholding update \*/—
  - 12:   Compute  $\mathcal{P}_{S_t}(\mathbf{G}^t) \leftarrow$  the gradient value  $\mathbf{G}^t = \frac{1}{m} \sum_{i \in \mathcal{B}_t} u_i \mathbf{x}_i \mathbf{x}_i^\top$  only calculated on  $S_t$ .
  - 13:   Update  $\Theta^{t+1} = \mathcal{H}_k(\Theta^t - \eta \mathcal{P}_{S_t}(\mathbf{G}^t))$ .
  - 14: **Return:**  $\hat{\Theta} = \Theta^T$
- 

---

**Algorithm 2** APPROXIMATED TOP ELEMENTS EXTRACTION (ATEE)

---

- 1: **Input:** Matrix  $\mathbf{A}$ , matrix  $\mathbf{B}$ , top selection size  $k$
  - 2: **Parameters:** Output set size upper bound  $b$ , repetition number  $d$ , significant level  $\Delta$
  - 3: **Expected Output:** Set  $\Lambda$ : the top- $k$  elements in  $\mathbf{A}\mathbf{B}^\top$  with absolute value greater than  $\Delta$
  - 4: **Output:** Set  $\tilde{\Lambda}$  of indices, with size at most  $b$  (approximately contains  $\Lambda$ )
- 
- 5: **Short Description:** This algorithm is adopted directly from [21]. It follows from the matrix compressed product via FFT (see section 2.2 of [21]) and sub-linear result extraction by error-correcting code (see section 4 of [21]), which drastically reduces the complexity. The whole process is repeated for  $d$  times to boost the success probability. The notation here matches [21] exactly, except that we use  $p$  for dimension while  $n$  is used in [21] instead.
- 6: Intuitively, the algorithm will put all the elements of  $\mathbf{A}\mathbf{B}^\top$  into  $b$  different "basket"s, with each of the elements assigned a positive or negative sign. It then selects the "basket" whose magnitude is greater than  $\Delta$ . Further, one large element is recovered from each of the selected baskets.
- 

the following update rule

$$(\text{standard IHT}) \quad \Theta^{t+1} = \mathcal{H}_k(\Theta^t - \eta \nabla F_n(\Theta^t))$$

where  $F_n(\cdot)$  is the average loss defined in (1), and  $\mathcal{H}_k(\cdot)$  is the hard-thresholding operator that chooses the largest  $k$  elements (in terms of absolute value) of the matrix given to it, and sets the rest to 0. Here,  $k$  is the estimation sparsity parameter. In this update equation, the current iterate  $\Theta^t$  has  $k$  non-zero elements and so can be stored efficiently. But the gradient  $\nabla F_n(\Theta^t)$  is  $p^2$  dimensional; this causes IHT to have  $\Omega(p^2)$  complexity. This issue remains even if the gradient is replaced by a stochastic gradient that uses fewer samples, since even in a stochastic gradient the number of variables remains  $p^2$ .

**A key observation:** We only need to know the top- $2k$  elements of this gradient  $\nabla F_n(\Theta^t)$ , because of the following simple fact: if  $\mathbf{A}$  is a  $k$ -sparse matrix, and  $\mathbf{B}$  is any matrix, then

$$\text{supp}(\mathcal{H}_k(\mathbf{A} + \mathbf{B})) \subset \text{supp}(\mathbf{A}) \cup \text{supp}(\mathcal{H}_{2k}(\mathbf{B})).$$

That is, the support of the top  $k$  elements of the sum  $\mathbf{A} + \mathbf{B}$  is inside the union of the support of  $\mathbf{A}$ , and the top- $2k$  elements of  $\mathbf{B}$ . The size of this union set is at most  $3k$ .

Thus, in the context of standard IHT, we do not really need to know the full (stochastic) gradient  $\nabla F_n(\Theta^t)$ ; instead we only need to know (a) the values and locations of its top- $2k$  elements, and (b) evaluate at most  $k$  extra elements of it – those corresponding to the support of the current  $\Theta^t$ .

The **key idea** of our method is to exploit the special structure of the quadratic model to find the top- $2k$  elements of the batch gradient  $\nabla f_{\mathcal{B}}$  in sub-quadratic time. Specifically,  $\nabla f_{\mathcal{B}}$  has the following form:

$$\nabla f_{\mathcal{B}}(\Theta) \triangleq \frac{1}{m} \sum_{i \in \mathcal{B}} \nabla f(\mathbf{x}_i^\top \Theta \mathbf{x}_i, y_i) = \frac{1}{m} \sum_{i \in \mathcal{B}} u(\Theta, \mathbf{x}_i, y_i) \mathbf{x}_i \mathbf{x}_i^\top, \quad (2)$$

where  $u(\Theta, \mathbf{x}_i, y_i)$  is a scalar related to the residual and the derivative of link function, and  $\mathcal{B}$  represents the mini-batch where  $\mathcal{B} \subset [n], |\mathcal{B}| = m$ . This allows us to approximately find the top- $2k$  elements of the  $p^2$ -dimensional stochastic gradient in  $\tilde{\mathcal{O}}(k(p+k))$  time and space, which is sub-quadratic when  $k$  is  $\mathcal{O}(p^\gamma)$  for  $\gamma < 1$ .

Our algorithm is formally described in Algorithm 1. We use Approximate Top Elements Extraction (ATEE) to approximately find the top- $2k$  elements of the gradient, which is briefly summarized in Algorithm 2, based on the idea of Pagh [21]. The full algorithm is re-organized and provided in Appendix A for completeness. Our method, Interaction Hard Thresholding (IntHT) builds on IHT, but needs a substantially new analysis for proof of consistency. The subsequent section goes into the details of its analysis.

## 4 Theoretical Guarantees

In this section, we establish the consistency of Interaction Hard Thresholding, in the standard setting where sparse recovery is established.

Specifically, we establish convergence results under deterministic assumptions on the data and function, including restricted strong convexity (RSC) and smoothness (RSM). Then, we analyze the sample complexity when features are generated from sub-gaussian distribution in the quadratic regression setting, in order to have well-controlled RSC and RSM parameters. The analysis of required sample complexity yields an overall complexity that is sub-quadratic in time and space.

### 4.1 Preliminaries

We first describe the standard deterministic setting in which sparse recovery is typically analyzed. Specifically, the samples  $(\mathbf{x}_i, y_i)$  are fixed and known. Our first assumption defines how our intended recovery target  $\Theta^*$  relates to the resulting loss function  $F_n(\cdot)$ .

**Assumption 1** (Standard identifiability assumption). *There exists a  $\Theta^*$  which is  $K$ -sparse such that the following holds: given any batch  $\mathcal{B} \subset [n]$  of  $m$  samples, the norm of batch gradient at  $\Theta^*$  is bounded by constant  $G$ . That is,  $\|\nabla f_{\mathcal{B}}(\Theta^*)\|_F \leq G$ , and  $\|\Theta^*\|_\infty \leq \omega$ .*

In words, this says the the gradient at  $\Theta^*$  is small. In a noiseless setting where data is generated from  $\Theta^*$ , e.g. when  $y_i = \mathbf{x}_i^\top \Theta^* \mathbf{x}_i$ , this gradient is 0; i.e. the above is satisfied with  $G = 0$ , and  $\Theta^*$  would be the exact sparse optimum of  $F_n(\cdot)$ . The above assumption generalizes this notion to noisy and non-linear cases, relating our recovery target  $\Theta^*$  to the loss function. This is a standard setup assumption in sparse recovery.

Now that we have specified what  $\Theta^*$  is and why it is special, we specify the properties the loss function needs to satisfy. These are again standard in the sparse recovery literature [20, 26, 14].

**Assumption 2** (Standard landscape properties of the loss). *For any pair  $\Theta_1, \Theta_2$  and  $s \leq p^2$  such that  $|\text{supp}(\Theta_1 - \Theta_2)| \leq s$*

- *The overall loss  $F_n$  satisfies  $\alpha_s$ -Restricted Strong Convexity (RSC):*

$$F_n(\Theta_1) - F_n(\Theta_2) \geq \langle \Theta_1 - \Theta_2, \nabla_{\Theta} F_n(\Theta_2) \rangle + \frac{\alpha_s}{2} \|\Theta_1 - \Theta_2\|_F^2$$

- *The mini-batch loss  $f_{\mathcal{B}}$  satisfies  $L_s$ -Restricted Strong Smoothness (RSM):*

$$\|\nabla f_{\mathcal{B}}(\Theta_1) - \nabla f_{\mathcal{B}}(\Theta_2)\|_F \leq L_s \|\Theta_1 - \Theta_2\|_F, \forall \mathcal{B} \subset [n], |\mathcal{B}| = m$$

- *$f_{\mathcal{B}}$  satisfies Restricted Convexity (RC) (but not strong):*

$$f_{\mathcal{B}}(\Theta_1) - f_{\mathcal{B}}(\Theta_2) - \langle \nabla f_{\mathcal{B}}(\Theta_2), \Theta_1 - \Theta_2 \rangle \geq 0, \forall \mathcal{B} \subset [n], |\mathcal{B}| = m, s = 3k + K$$

**Note:** While our assumptions are standard, our result does not follow immediately from existing analyses – because we cannot find the exact top elements of the gradient. We need to do a new analysis to show that even with our approximate top element extraction, linear convergence to  $\Theta^*$  still holds.

## 4.2 Main Results

Here we proceed to establish the sub-quadratic complexity and consistency of IntHT for parameter estimation. Theorem 1 presents the analysis of ATEE. It provides the computation complexity analysis, as well as the statistical guarantee of support recovery. Based on this, we show the per round convergence property of Algorithm 1 in Theorem 3. We then establish our main statistical result, the linear convergence of Algorithm 1 in Theorem 4.

Next, we discuss the batch size that guarantees support recovery in Theorem 5, focusing on the quadratic regression setting, i.e. the model is linear in both interaction terms and linear terms. Combining all the established results, the sub-quadratic complexity is established in Corollary 6. All the proofs in this subsection can be found in Appendix E.

**Analysis of ATEE** Consider ATEE with parameters set to be  $b, d, \Delta$ . Recall this means that ATEE returns an index set  $(\tilde{\Lambda})$  of size at most  $b$ , which is expected to contain the desired index set  $(\Lambda)$ . Note that the desired index set  $(\Lambda)$  is composed by the top- $2k$  elements of gradient  $\nabla f_{\mathcal{B}}(\Theta)$  whose absolute value is greater than  $\Delta$ . Suppose now the current estimate is  $\Theta$ , and  $\mathcal{B}$  is the batch. The following theorem establishes when this output set  $(\tilde{\Lambda})$  captures the top elements of the gradient.

**Theorem 1** (Recovering top- $2k$  elements of the gradient, modified from [21]). *With the setting above, if we choose  $b, d, \Delta$  so that  $b\Delta^2 \geq 432 \|\nabla f_{\mathcal{B}}(\Theta)\|_F^2$  and  $d \geq 48 \log 2ck$ , then the index set  $(\tilde{\Lambda})$  returned by ATEE contains the desired index set  $(\Lambda)$  with probability at least  $1 - 1/c$ .*

*Also in this case the time complexity of ATEE is  $\tilde{O}(m(p+b))$ , and space complexity is  $\tilde{O}(m(p+b))$ .*

Theorem 1 requires that parameter  $b, \Delta$  are set to satisfy  $b\Delta^2 \geq 432 \|\nabla f_{\mathcal{B}}(\Theta)\|_F^2$ . Note that  $\Delta$  controls the minimum magnitude of top- $k$  element we can found. To avoid getting trivial extraction result, we need to set  $\Delta$  as a constant that doesn't scale with  $p$ . In order to control the scale of  $\Delta$  and  $b$ , to get consistent estimation and to achieve sub-quadratic complexity, we need to upper bound  $\|\nabla f_{\mathcal{B}}(\Theta)\|_F^2$ . This is the *compressibility estimation* problem that was left open in [21]. In our case, the batch gradient norm can be controlled by the RSM property. More formally, we have

**Lemma 2** (Frobenius norm bound of gradient). *The Frobenius norm of batch gradient at arbitrary  $k$ -sparse  $\Theta$ , with  $\|\Theta\|_{\infty} \leq \omega$ , can be bounded as  $\|\nabla f_{\mathcal{B}}(\Theta)\|_F \leq 2L_{2k}\sqrt{k}\omega + G$ , where  $G$  is the uniform bound on  $\|\nabla f_{\mathcal{B}}(\Theta^*)\|_F$  over all batches  $\mathcal{B}$  and  $\omega$  bounds  $\|\Theta^*\|_{\infty}$  (see Assumption 1).*

Lemma 2 directly implies that Theorem 1 could allow  $b$  scale linearly with  $k$  while keep  $\Delta$  as a constant<sup>2</sup>. This is the key ingredient to achieve sub-quadratic complexity and consistent estimation. We postpone the discussion for complexity to later paragraph, and proceed to finish the statistical analysis of gradient descent.

**Convergence of IntHT:** Consider IntHT with parameter set to be  $\eta, k$ . For the purpose of analysis, we keep the definition of  $\Lambda$  and  $\tilde{\Lambda}$  from the analysis of ATEE and further define  $k_{\Delta}$  to be the number of top- $2k$  elements whose magnitude is below  $\Delta$ . Recall that  $K$  is the sparsity of  $\Theta^*$ , define  $\nu = 1 + \left(\rho + \sqrt{(4+\rho)\rho}\right)/2$ ,  $\rho = K/k$ , where  $\nu$  measures the error induced by exact IHT (see Lemma 9 for detail). Denote  $B_t = \{\mathcal{B}_0, \mathcal{B}_1, \dots, \mathcal{B}_t\}$ . We have

**Theorem 3** (Per-round convergence of IntHT). *Following the above notations, the per-round convergence of Algorithm 1 satisfies the following:*

- If ATEE succeeds, i.e.,  $\Lambda \subseteq \tilde{\Lambda}$ , then

$$\mathbb{E}_{B_t} \left[ \|\Theta^t - \Theta^*\|_F^2 \right] \leq \kappa_1 \mathbb{E}_{B_{t-1}} \left[ \|\Theta^{t-1} - \Theta^*\|_F^2 \right] + \sigma_{GD}^2 + \sigma_{\Delta|GD}^2,$$

where  $\kappa_1 = \nu(1 - 2\eta\alpha_{2k} + 2\eta^2 L_{2k}^2)$ ,  $\sigma_{\Delta|GD}^2 = 4\sqrt{k_{\Delta}}\eta\sqrt{k}\omega\Delta + 2k_{\Delta}\eta^2\Delta^2$ , and

$$\sigma_{GD}^2 = \max_{|\Omega| \leq 2k+K} \left[ 4\nu\eta\sqrt{k}\omega \|\mathcal{P}_{\Omega}(\nabla F(\Theta^*))\|_F + 2\nu\eta^2 \mathbb{E}_{B_t} \left[ \|\mathcal{P}_{\Omega}(\nabla f_{\mathcal{B}_t}(\Theta^*))\|_F^2 \right] \right].$$

- If ATEE fails, i.e.,  $\Lambda \not\subseteq \tilde{\Lambda}$ , then,

$$\mathbb{E}_{B_t} \left[ \|\Theta^t - \Theta^*\|_F^2 \right] \leq \kappa_2 \mathbb{E}_{B_{t-1}} \left[ \|\Theta^{t-1} - \Theta^*\|_F^2 \right] + \sigma_{GD}^2 + \sigma_{fail|GD}^2,$$

<sup>2</sup>For now, we assume  $L_{2k}$  to be a constant independent of  $p, k$ . We will discuss this in Theorem 5.

where  $\kappa_2 = \kappa_1 + 2\nu\eta L_{2k}$ ,  $\sigma_{Fail|GD}^2 = \max_{|\Omega| \leq 2k+K} \left[ 4\nu\eta\sqrt{k}\omega \mathbb{E}_{\mathcal{B}_t} [\|\mathcal{P}_\Omega(\nabla f_{\mathcal{B}_t}(\Theta^*))\|_F] \right]$ .

**Remark 1.** It is worth noting that  $\sigma_{GD}, \sigma_{Fail|GD}$  are both statistical errors, which in the noiseless case are 0. In the case that the magnitude of top-2k elements in the gradient are all greater than  $\Delta$ , we have  $k_\Delta = 0$ , which implies  $\sigma_{\Delta|GD} = 0$ . In this case ATEE's approximation doesn't incur any additional error compared with exact IHT.

Theorem 3 shows that by setting  $k = \Theta(KL_{2k}^2/\alpha_{2k}^2), \eta = \alpha_{2k}/2L_{2k}^2$ , the parameter estimation can be improved geometrically when ATEE succeeds. We will show in Theorem 5 that with sufficiently large batch size  $m$ ,  $\alpha_{2k}, L_{2k}$  are controlled and don't scale with  $k, p$ . When ATEE fails, it can't make the  $\Theta$  estimation worse by too much. Given that success rate of ATEE is controlled in Theorem 1, it naturally suggests that we can obtain the linear convergence in expectation. This leads to Theorem 4.

Define  $\sigma_1^2 = \sigma_{GD}^2 + \sigma_{\Delta|GD}^2$ , and  $\sigma_2^2 = \sigma_{GD}^2 + \sigma_{Fail|GD}^2$ . Let  $\phi_t$  to be the success indicator of ATEE at time step  $t$ , and  $\Phi_t = \{\phi_0, \phi_1, \dots, \phi_t\}$ . By Theorem 1, with  $d = 48 \log 2ck$ , ATEE recovers top-2k with probability at least  $(1 - 1/c)$ , we can easily show the convergence of Algorithm 1 as

**Theorem 4** (Main result). *Following the above notations, the expectation of the parameter recovery error of Algorithm 1 is bounded by*

$$\begin{aligned} \mathbb{E}_{B_t, \Phi_t} [\|\Theta^t - \Theta^*\|_F^2] &\leq \left( \kappa_1 + \frac{1}{c} (\kappa_2 - \kappa_1) \right)^t \|\Theta^0 - \Theta^*\|_F^2 \\ &+ \left[ \left( \kappa_1 + \frac{1}{c} (\kappa_2 - \kappa_1) \right)^t - 1 \right] \left( \frac{\sigma_1^2}{\kappa_1 - 1} \right) + \frac{\kappa_2 - 1}{c - c\kappa_1 + \kappa_1 - \kappa_2} \left( \frac{\sigma_2^2}{\kappa_2 - 1} - \frac{\sigma_1^2}{\kappa_1 - 1} \right). \end{aligned}$$

This shows that Algorithm 1 achieves linear convergence by setting  $c \geq (\kappa_2 - \kappa_1)/(1 - \kappa_1)$ . With  $c$  increasing, the error ball converges to  $\sigma_1^2/(1 - \kappa_1)$ . The proof follows directly by taking expectation of the result we obtain in Theorem 3 with the recovery success probability established in Theorem 1.

**Computational analysis** With the linear convergence, the computational complexity is dominated by the complexity per iteration. Before discussing the complexity, we first establish the dependency between  $L_k, \alpha_k$  and  $m$  in the special case of quadratic regression, where the link function is identity. Notice that similar results would hold for more general quadratic problems as well.

**Theorem 5** (Minimum batch size). *For feature vector  $\mathbf{x} \in \mathbb{R}^p$ , whose first  $p - 1$  coordinates are drawn i.i.d. from a bounded distribution, and the  $p$ -th coordinate is constant 1. W.l.o.g., we assume the first  $p - 1$  coordinates to be zero mean, variance 1 and bounded by  $B$ . With batch size  $m \gtrsim kB \log p/\epsilon^2$  we have  $\alpha_k \geq 1 - \epsilon$ ,  $L_k \leq 1 + \epsilon$  with high probability.*

Note that the sample complexity requirement matches the known information theoretic lower bound for recovering  $k$ -sparse  $\Theta$  up to a constant factor. The proof is similar to the analysis of restricted isometry property in sparse recovery. Recall that by Theorem 1, we have the per-iteration complexity  $\tilde{\mathcal{O}}(m(p + b))$ . Combining the results of Lemma 2, Theorems 4 and 5, we have the following corollary on the complexity:

**Corollary 6** (Achieving sub-quadratic space and time complexity). *In the case of quadratic regression, by setting the parameters as above, IntHT recovers  $\Theta^*$  in expectation up to a noise ball with linear convergence. The time and space complexity of IntHT is  $\tilde{\mathcal{O}}(k(k + p))$ , which is sub-quadratic when  $k$  is  $\mathcal{O}(p^\gamma)$  for  $\gamma < 1$ .*

Note that the optimal time and space complexity is  $\Omega(kp)$ , since a minimum of  $\Omega(k)$  samples are required for recovery, and  $\Omega(p)$  for reading all entries. Corollary 6 shows the time and space complexity of IntHT is  $\tilde{\mathcal{O}}(k(k + p))$ , which is nearly optimal.

## 5 Synthetic Experiments

To examine the sub-quadratic time and space complexity, we design three tasks to answer the following three questions: (i) Whether Algorithm 1 maintains linear convergence despite the hard thresholding not being accurate? (ii) What is the dependency between  $b$  and  $k$  to guarantee successful recovery? (iii) What is the dependency between  $m$  and  $p$  to guarantee successful recovery? Recall that

the per-iteration complexity of Algorithm 1 is  $\tilde{O}(m(p+b))$ , where  $b$  upper bounds the size of ATEE’s output set,  $p$  is the dimension of features and  $m$  is batch size and  $k$  is the sparsity of estimation. It will be clear as we proceed how the three questions can support sub-quadratic complexity.

**Experimental setting** We generate feature vectors  $\mathbf{x}_i$ , whose coordinates follow i.i.d. uniform distribution on  $[-1, 1]$ . Constant 1 is appended to each feature vector to model the linear terms and intercept. The true support is uniformly selected from all the interaction and linear terms, where the non-zero parameters are then generated uniformly on  $[-20, -10] \cup [10, 20]$ . Note that for the experiment concerning minimum batch size  $m$ , we instead use Bernoulli distribution to generate both the features and the parameters, which reduces the variance for multiple random runs and makes our phase transition plot clearer. The output  $y_i$ s, are generated following  $\mathbf{x}_i^T \Theta^* \mathbf{x}_i$ . On the algorithm side, by default, we set  $p = 200$ ,  $d = 3$ ,  $K = 20$ ,  $k = 3K$ ,  $\eta = 0.2$ . Support recovery results with different  $b$ - $K$  combinations are averaged over 3 independent runs, results for  $m$ - $p$  combinations are averaged over 5 independent runs. All experiments are terminated after 150 iterations.

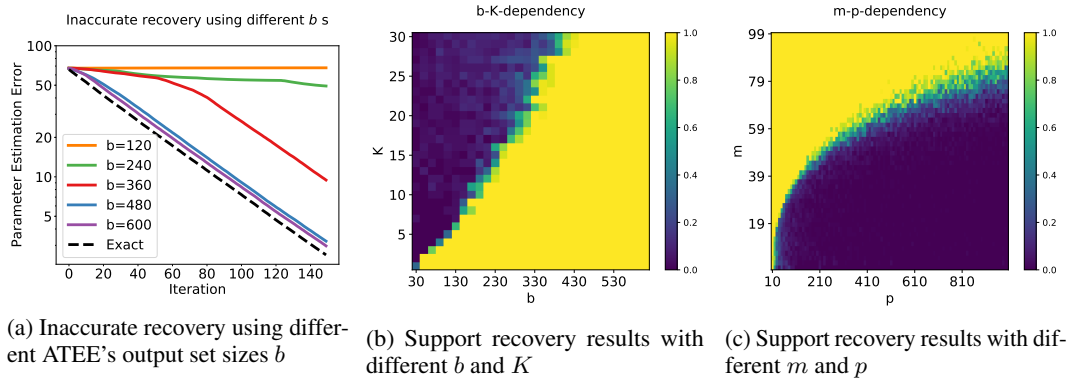

Figure 1: Synthetic experiment results: note  $b, m$  are the parameters we used for IntHT and ATEE, where  $b$  upper bounds the size of ATEE’s output set and  $m$  is the batch size used for IntHT. Recall  $p$  is the dimension of features and  $K$  is the sparsity of  $\Theta^*$ . (a) the convergence behavior with different choices of  $b$ . Linear convergence holds for small  $b$ , e.g., 360, when the parameter space is around 20,000. (b) Support recovery results with different choices of  $(b, K)$ . We observe a linear dependence between  $b$  and  $K$ . (c) Support recovery results with different choices of  $(m, p)$ .  $m$  scales sub-linearly with  $p$  to ensure a success recovery.

**Inaccurate support recovery with different  $b$ ’s** Figure 1-(a) demonstrates different convergence results, measured by  $\|\Theta - \Theta^*\|_F$  with multiple choices of  $b$  for ATEE in Algorithm 1. The dashed curve is obtained by replacing ATEE with exact top elements extraction (calculates the gradient exactly and picks the top elements). This is statistically optimal, but comes with quadratic complexity. By choosing a moderately large  $b$ , the inaccuracy induced by ATEE has negligible impact on the convergence. Therefore, Algorithm 1 can maintain the linear convergence despite the support recovery in each iteration is inaccurate. This aligns with Theorem 3. With linear convergence, the per iteration complexity will dominate the overall complexity.

**Dependency between  $b$  and sparsity  $k$**  We proceed to see the proper choice of  $b$  under different sparsity  $k$  (we use  $k = 3K$ ). We vary the sparsity  $K$  from 1 to 30, and apply Algorithm 1 with  $b$  ranges from 30 to 600. As shown in Figure 1-(b), the minimum proper choice of  $b$  scales no more than linearly with  $k$ . This agrees with our analysis in Theorem 1. The per-iteration complexity then collapse to  $\tilde{O}(m(p+k))$ .

**Dependency between batch size  $m$  and dimension  $p$**  Finally, we characterize the dependency between minimum batch size  $m$  and the input dimension  $p$ . This will complete our discussion on the per-iteration complexity. The batch size varies from 1 to 99, and the input dimension varies from 10 to 1000. In this experiment, we employ the Algorithm 1 with ATEE replaced by exact top- $k$  elements extraction. Figure 1-(c) demonstrates the support recovery success rate of each  $(k, p)$  combination. It shows the minimum batch size scales in logarithm with dimension  $p$ , as we proved in Theorem 5. Together with the previous experiment, it establishes the sub-quadratic complexity.

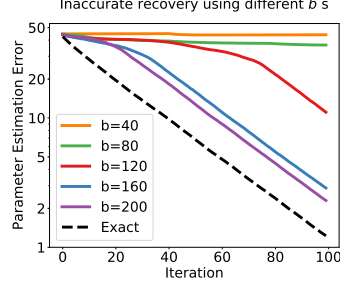

Figure 2: 3-order regression support recovery using different ATEE’s output set sizes  $b$

**Higher order interaction** IntHT is also extensible to higher order interactions. Specifically, by exploiting similar gradient structure  $\sum r_i \mathbf{x}_i \otimes \mathbf{x}_i \otimes \mathbf{x}_i$ , where  $r_i$  denotes the residual for  $(\mathbf{X}_i, y_i)$ ,  $\otimes$  denotes the outer product of vector, we can again combine sketching with high-dimensional optimization to achieve nearly linear time and space (for constant sparsity).

For the experiment, we adopt the similar setting as for the **Inaccurate support recovery with different  $b$ s** experiment. The main difference is that we change from  $y_i = \mathbf{x}_i^\top \Theta^* \mathbf{x}_i$  to  $y_i = \sum \Theta_{i,j,k} \mathbf{x}_i \mathbf{x}_j \mathbf{x}_k$ , where  $\Theta$  is now a three dimension tensor. Further, we set the dimension of  $\mathbf{x}$  to 30 and the sparsity  $K = 20$ . Figure 2 demonstrates the result of support recovering of 3-order interaction terms with different setting of  $b$ , where  $b$  still bounds the size of ATEE’s output set. We can see that IntHT still maintains the linear convergence in the higher order setting.

## Acknowledgement

We would like to acknowledge NSF grants 1302435 and 1564000 for supporting this research.

## References

- [1] Amir Abboud, Aviad Rubinfeld, and Ryan Williams. Distributed pcp theorems for hardness of approximation in p. In *2017 IEEE 58th Annual Symposium on Foundations of Computer Science (FOCS)*, pages 25–36. IEEE, 2017.
- [2] Grey Ballard, Tamara G Kolda, Ali Pinar, and C Seshadhri. Diamond sampling for approximate maximum all-pairs dot-product (mad) search. In *2015 IEEE International Conference on Data Mining*, pages 11–20. IEEE, 2015.
- [3] Jacob Bien, Jonathan Taylor, and Robert Tibshirani. A lasso for hierarchical interactions. *Annals of statistics*, 41(3):1111, 2013.
- [4] Thomas Blumensath and Mike E Davies. Iterative hard thresholding for compressed sensing. *Applied and computational harmonic analysis*, 27(3):265–274, 2009.
- [5] Lijie Chen. On the hardness of approximate and exact (bichromatic) maximum inner product. In *33rd Computational Complexity Conference (CCC 2018)*. Schloss Dagstuhl-Leibniz-Zentrum fuer Informatik, 2018.
- [6] Scott Shaobing Chen, David L Donoho, and Michael A Saunders. Atomic decomposition by basis pursuit. *SIAM review*, 43(1):129–159, 2001.
- [7] Nam Hee Choi, William Li, and Ji Zhu. Variable selection with the strong heredity constraint and its oracle property. *Journal of the American Statistical Association*, 105(489):354–364, 2010.
- [8] Bradley Efron, Trevor Hastie, Iain Johnstone, Robert Tibshirani, et al. Least angle regression. *The Annals of statistics*, 32(2):407–499, 2004.
- [9] Botao Hao, Anru Zhang, and Guang Cheng. Sparse and low-rank tensor estimation via cubic sketchings. *arXiv preprint arXiv:1801.09326*, 2018.
- [10] Ning Hao, Yang Feng, and Hao Helen Zhang. Model selection for high-dimensional quadratic regression via regularization. *Journal of the American Statistical Association*, 113(522):615–625, 2018.
- [11] Ning Hao and Hao Helen Zhang. Interaction screening for ultrahigh-dimensional data. *Journal of the American Statistical Association*, 109(507):1285–1301, 2014.
- [12] Prateek Jain, Ambuj Tewari, and Purushottam Kar. On iterative hard thresholding methods for high-dimensional m-estimation. In *Advances in Neural Information Processing Systems*, pages 685–693, 2014.
- [13] Murat Kocaoglu, Karthikeyan Shanmugam, Alexandros G Dimakis, and Adam Klivans. Sparse polynomial learning and graph sketching. In *Advances in Neural Information Processing Systems*, pages 3122–3130, 2014.
- [14] Xingguo Li, Raman Arora, Han Liu, Jarvis Haupt, and Tuo Zhao. Nonconvex sparse learning via stochastic optimization with progressive variance reduction. *arXiv preprint arXiv:1605.02711*, 2016.
- [15] Yun Li, George T. O’Connor, Josée Dupuis, and Eric D. Kolaczyk. Modeling gene-covariate interactions in sparse regression with group structure for genome-wide association studies. *Statistical applications in genetics and molecular biology*, 14 3:265–77, 2015.
- [16] Michael Lim and Trevor Hastie. Learning interactions via hierarchical group-lasso regularization. *Journal of Computational and Graphical Statistics*, 24(3):627–654, 2015.
- [17] Liu Liu, Yanyao Shen, Tianyang Li, and Constantine Caramanis. High dimensional robust sparse regression. *arXiv preprint arXiv:1805.11643*, 2018.

- [18] Yishay Mansour. Randomized interpolation and approximation of sparse polynomials. *SIAM Journal on Computing*, 24(2):357–368, 1995.
- [19] Tomoya Murata and Taiji Suzuki. Sample efficient stochastic gradient iterative hard thresholding method for stochastic sparse linear regression with limited attribute observation. In *Advances in Neural Information Processing Systems*, pages 5317–5326, 2018.
- [20] Nam Nguyen, Deanna Needell, and Tina Woolf. Linear convergence of stochastic iterative greedy algorithms with sparse constraints. *IEEE Transactions on Information Theory*, 63(11):6869–6895, 2017.
- [21] Rasmus Pagh. Compressed matrix multiplication. *ACM Transactions on Computation Theory (TOCT)*, 5(3):9, 2013.
- [22] Ali Rahimi and Benjamin Recht. Random features for large-scale kernel machines. In *Advances in neural information processing systems*, pages 1177–1184, 2008.
- [23] Steffen Rendle. Factorization machines. In *2010 IEEE International Conference on Data Mining*, pages 995–1000. IEEE, 2010.
- [24] John Shawe-Taylor, Nello Cristianini, et al. *Kernel methods for pattern analysis*. Cambridge university press, 2004.
- [25] Yiyuan She, Zhifeng Wang, and He Jiang. Group regularized estimation under structural hierarchy. *Journal of the American Statistical Association*, 113(521):445–454, 2018.
- [26] Jie Shen and Ping Li. A tight bound of hard thresholding. *The Journal of Machine Learning Research*, 18(1):7650–7691, 2017.
- [27] Anshumali Shrivastava and Ping Li. Asymmetric lsh (alsh) for sublinear time maximum inner product search (mips). In *Advances in Neural Information Processing Systems*, pages 2321–2329, 2014.
- [28] Michael Sipser and Daniel A Spielman. Expander codes. In *Proceedings 35th Annual Symposium on Foundations of Computer Science*, pages 566–576. IEEE, 1994.
- [29] Robert Tibshirani. Regression shrinkage and selection via the lasso. *Journal of the Royal Statistical Society: Series B (Methodological)*, 58(1):267–288, 1996.
- [30] Roman Vershynin. Introduction to the non-asymptotic analysis of random matrices. *arXiv preprint arXiv:1011.3027*, 2010.
- [31] Ryan Williams. On the difference between closest, furthest, and orthogonal pairs: Nearly-linear vs barely-subquadratic complexity. In *Proceedings of the Twenty-Ninth Annual ACM-SIAM Symposium on Discrete Algorithms*, pages 1207–1215. Society for Industrial and Applied Mathematics, 2018.
- [32] Jing Wu, Bernie Devlin, Steven Ringquist, Massimo Trucco, and Kathryn Roeder. Screen and clean: a tool for identifying interactions in genome-wide association studies. *Genetic Epidemiology: The Official Publication of the International Genetic Epidemiology Society*, 34(3):275–285, 2010.
- [33] Hsiang-Fu Yu, Cho-Jui Hsieh, Qi Lei, and Inderjit S Dhillon. A greedy approach for budgeted maximum inner product search. In *Advances in Neural Information Processing Systems*, pages 5453–5462, 2017.
- [34] Rose Yu and Yan Liu. Learning from multiway data: Simple and efficient tensor regression. In *International Conference on Machine Learning*, pages 373–381, 2016.
- [35] Kaiqing Zhang, Zhuoran Yang, and Zhaoran Wang. Nonlinear structured signal estimation in high dimensions via iterative hard thresholding. In *International Conference on Artificial Intelligence and Statistics*, pages 258–268, 2018.

## A Details of ATEE

In this section, we provide the formal algorithm for ATEE, stated in Algorithm 3. ATEE consists of two sub-routines: an efficient sketching operation (line 5-11), and an efficient extraction operation (line 12-15).

For the sketching part, the algorithm first generate expander code which maps  $[p]$  to  $\{0, 1\}^l$ , where  $l$  is the length of the codeword. Based on this encoding, we construct a table  $\mathbf{E} \in \{0, 1\}^{p \times l}$  where the  $i$ -th row is the codeword which encoded from  $i$ . Denote  $\mathbf{e}_r$  as the  $r$ -th column of  $\mathbf{E}$ , we construct diagonal matrix  $\mathbf{I}_{\mathbf{e}_r} = \text{diag}(\mathbf{e}_r)$ . Then  $2l$  different sub-matrices of  $\mathbf{A}$  and  $\mathbf{B}$  is constructed by  $\mathbf{C}_r = \mathbf{I}_{\mathbf{e}_r} \mathbf{A}$ ,  $\mathbf{C}_{r+l} = \mathbf{I}_{\mathbf{e}_r} \mathbf{B}$ ,  $\forall r \in [l]$ . It then sketches  $\mathbf{A} \mathbf{C}_{r+l}^\top$  and  $\mathbf{C}_r \mathbf{B}$ , each of the matrices into a  $b$  length vector, where  $b \ll p^2$ . The result is stored in  $\mathbf{S} \in \mathbb{R}^{2l \times b}$ . By exploiting the factorization of this matrix, the matrix outer product can be sketched in  $\mathcal{O}(b \log(b))$  using fast Fourier transform (FFT) as used in [21](line 18 - 21).

For the sub-linear extraction, we first binarify the matrix  $\mathbf{S}$  with threshold  $\Delta/2$ . Then each column of  $\mathbf{S}$  becomes a codeword, where the first  $l$  bits encodes the row index of the elements whose absolute value is greater than  $\Delta/2$ , the last  $l$  bits encode its column index. By using expander code, it takes linear time  $\mathcal{O}(l)$  to finish decoding. The whole process will be repeated for  $d$  times and only the elements that are recovered for more than  $d/2$  times will be recorded for output. This can boost the success probability of top- $k$  support recovery.

---

### Algorithm 3 APPROXIMATE TOP ELEMENTS EXTRACTION (ATEE-FORMAL)

---

```

1: Input: Matrix  $\mathbf{A}$ , matrix  $\mathbf{B}$ , top selection size  $k$ 
2: Parameters: Output set size limit  $b$ , repetition number  $d$ , significant level  $\Delta$ 
3: Expected Output: A set  $\Lambda$ , which is the top- $k$  elements in  $\mathbf{A} \mathbf{B}^\top$  whose absolute value is also greater than  $\Delta$ 
4: Output: Set  $\tilde{\Lambda}$  of indices, with size at most  $b$  and approximately contains  $\Lambda$ 
5: for  $t = 0$  to  $d - 1$  do
6:   Construct expander code table  $\mathbf{E} \in \{0, 1\}^{p \times l}$ . Let  $\mathbf{e}_r$  be the  $r$ -th column of  $\mathbf{E}$ 
7:    $\mathbf{I}_{\mathbf{e}_r} = \text{diag}(\mathbf{e}_r)$ ,  $\mathbf{C}_r = \mathbf{I}_{\mathbf{e}_r} \mathbf{A}$ ,  $\mathbf{C}_{r+l} = \mathbf{I}_{\mathbf{e}_r} \mathbf{B}$ ,  $\forall r \in [l]$ . Init  $\mathbf{S}$  as a  $2l \times b$  matrix
8:   Generate pairwise independent hash functions  $h_1, h_2 : [p] \rightarrow [b]$ 
9:   for  $r = 0$  to  $l - 1$  do
10:     $\mathbf{S}[r, :] = \text{COMPRESSED-PRODUCT}(\mathbf{C}_r, \mathbf{B}, b, h_1, h_2)$ 
11:     $\mathbf{S}[r + l, :] = \text{COMPRESSED-PRODUCT}(\mathbf{A}, \mathbf{C}_{r+l}, b, h_1, h_2)$ 
12:   for  $q = 0$  to  $b - 1$  do
13:     $\mathbf{o}^q = \mathbf{1}(\mathbf{S}[:, q] > \frac{\Delta}{2})$ 
14:     $(i, j) = \text{DECODE}(\mathbf{o}^q; \mathbf{E})$ 
15:     $S = S \cup \{(i, j)\}$ 
16: Return:  $\{(i, j) | \#(i, j) \in S \geq \frac{d}{2}\}$ 


---


17: function COMPRESSED-PRODUCT( $\mathbf{A}, \mathbf{B}, b, h_1, h_2$ ):
18:   Generate random sign functions  $s_1, s_2 : [p] \rightarrow \{-1, +1\}$ , column length of  $\mathbf{A}, \mathbf{B}$  are  $m$ 
19:   for  $i = 0$  to  $m - 1$  do
20:     $\mathbf{p}_{\mathbf{a}_i} \leftarrow \text{COUNT-SKETCH}(\mathbf{a}_i, h_1, s_1, b)$ ,  $\mathbf{p}_{\mathbf{b}_i} \leftarrow \text{COUNT-SKETCH}(\mathbf{b}_i, h_2, s_2, b)$ 
21:     $\mathbf{s}_i = \text{IFFT}(\text{FFT}(\mathbf{p}_{\mathbf{a}_i}) \circ \text{FFT}(\mathbf{p}_{\mathbf{b}_i}))$ 
22:   Return:  $\mathbf{s} = \sum_{i=0}^{m-1} \mathbf{s}_i$ 


---


23: function COUNT-SKETCH( $\mathbf{x}, h, s, b$ )
24:   Init  $\mathbf{p}$  as a length  $b$  vector
25:   for  $i = 0$  to  $p - 1$  do
26:     $\mathbf{p}[h(i)] = \mathbf{p}[h(i)] + s(i) \mathbf{x}[i]$ 
27:   Return:  $\mathbf{p}$ 

```

---

## B IntHT-VR Algorithm

The application of IntHT to SVRG follows a very similar path as we apply it to SGD. The only trick is to utilize the linearity of sketching. For SVRG, we will generate the hash function  $h_1, h_2, s_1, s_2$  as described in SGD case at the begining of each outer iteration. They will be kept same through all the inner iterations. The skeching result  $\mathbf{s}^i$  of the full gradient at the beginning of  $i$ -th outer loop will add up with the sketching result  $\tilde{\mathbf{s}}_j^i$  of the corresponding  $j$ -th inner loop. The summation  $\mathbf{s}_j^i$  then goes through the decoding process, which is the same as SGD.

---

### Algorithm 4 INTHT WITH VARIANCE REDUCTION (INTHT-VR)

---

```

1: Input: Dataset  $\{\mathbf{x}_{i'}, y_{i'}\}_{i'=0}^{n-1}$ , threshold  $\Delta$ , dimension  $p$ , outer / inner round number  $T/t$ 
2: Output:  $\hat{\Theta}$ 
3: Parameters: Codeword length  $l$ , sketch size  $b$ , repetition number  $d$ 
4: Initialize  $\Theta^0$  as a  $p \times p$  zero matrix.
5: for  $i = 0$  to  $T - 1$  do
6:    $\Theta_0^i = \Theta^i$ , construct expander code table  $\mathbf{E}^i \in \{0, 1\}^{p \times l}$ .
7:   Generate hash functions  $h_1, h_2 : [p] \rightarrow [b]$ , and  $s_1, s_2 : [p] \rightarrow \{-1, 1\}$ 
8:    $\mathbf{s}^i = \text{INTERACTION-SKETCH}(\{\mathbf{x}_{i'}, u_{i'}\}_{i'=0}^{n-1}, \mathbf{E}^i, h_1, h_2, s_1, s_2)$ 
9:    $\mathbf{G}^i := \frac{1}{n} \sum_{i'=0}^{n-1} u_{i'} \mathbf{x}_{i'} \mathbf{x}_{i'}^\top$ 
10:  for  $j = 0$  to  $t - 1$  do
11:    Randomly pick a sample (min-batch)  $\mathcal{B}_j^i$ 
12:     $\tilde{u}_{i'} = u_{i'}(\Theta_j^i, \mathbf{x}_{i'}, y_{i'}) - u_{i'}(\Theta_0^i, \mathbf{x}_{i'}, y_{i'})$ ,  $\forall i' \in \mathcal{B}_j^i$ ,  $\tilde{\mathbf{G}}_j^i := \frac{1}{|\mathcal{B}_j^i|} \sum_{i' \in \mathcal{B}_j^i} \tilde{u}_{i'} \mathbf{x}_{i'} \mathbf{x}_{i'}^\top$ 
13:     $\tilde{\mathbf{s}}_j^i = \text{INTERACTION-SKETCH}(\{\mathbf{x}_{i'}, \tilde{u}_{i'}\}_{i' \in \mathcal{B}_j^i}, \mathbf{E}^i, h_1, h_2, s_1, s_2)$ 
14:     $\mathbf{s}_j^i = \mathbf{s}^i + \tilde{\mathbf{s}}_j^i$ 
15:     $\tilde{S}_j^i = \text{INTERACTION-DECODE}(\mathbf{s}_j^i, \Delta, \mathbf{E}^i)$ 
16:     $S_j^i = \tilde{S}_j^i \cup \text{supp}(\Theta_j^i)$ 
17:     $\mathcal{P}_{S_j^i}(\mathbf{G}_j^i) \leftarrow$  the gradient value  $\mathbf{G}_j^i := \mathbf{G}^i + \tilde{\mathbf{G}}_j^i$  calculated only on index set  $S_j^i$ ,
18:     $\Theta_{j+1}^i = \mathcal{H}_k(\Theta_j^i - \eta \mathcal{P}_{S_j^i}(\mathbf{G}_j^i))$ 
19:     $\Theta^{i+1} = \Theta_{j'}^i$ , for  $j' \sim \text{Unif}(\{0, \dots, t-1\})$ 
20: Return:  $\hat{\Theta} = \Theta^T$ 

21: function INTERACTION-SKETCH( $\{\mathbf{x}_i, u_i\}_{i \in \mathcal{B}}, \mathbf{E}, h_1, h_2, s_1, s_2$ ) :
22:   Set  $\mathbf{A} \in \mathbb{R}^{p \times |\mathcal{B}|}$ , where each column of  $\mathbf{A}(\mathbf{B})$  is  $u_i \mathbf{x}_i$ ,  $i \in \mathcal{B}$ .
23:   Set  $\mathbf{B} \in \mathbb{R}^{p \times |\mathcal{B}|}$ , where each column of  $\mathbf{A}(\mathbf{B})$  is  $\mathbf{x}_i$ ,  $i \in \mathcal{B}$ .
24:   Set  $\mathbf{s}$  as a  $d \times 2l \times b$  tensor.
25:   for  $t = 0$  to  $d - 1$  do
26:     Let  $\mathbf{e}_r$  be the  $r$ -th column of  $\mathbf{E}$ ,  $\mathbf{I}_{\mathbf{e}_r} = \text{diag}(\mathbf{e}_r)$ ,  $\mathbf{C}_r = \mathbf{I}_{\mathbf{e}_r} \mathbf{A}$ ,  $\mathbf{C}_{r+l} = \mathbf{I}_{\mathbf{e}_r} \mathbf{B}$ ,  $\forall r \in [l]$ .
27:     for  $r = 0$  to  $l - 1$  do
28:        $\mathbf{s}[t, r, :] = \text{COMPRESSED-PRODUCT}(\mathbf{C}_r, \mathbf{B}, b, h_1, h_2)$ 
29:        $\mathbf{s}[t, r + l, :] = \text{COMPRESSED-PRODUCT}(\mathbf{A}, \mathbf{C}_{r+l}, b, h_1, h_2)$ 
30:   Return:  $\mathbf{s}$ 

31: function INTERACTION-DECODE( $\mathbf{s}, \Delta, \mathbf{E}$ ) :
32:   Set  $S = \emptyset$ 
33:   for  $t = 0$  to  $d - 1$  do
34:     for  $q = 0$  to  $b - 1$  do
35:        $\mathbf{o}^{t,q} = \mathbf{1}(\mathbf{s}^{t,:q} > \frac{\Delta}{2})$ 
36:        $(i, j) = \text{DECODE}(\mathbf{o}^{t,q}, \mathbf{E})$ 
37:        $S = S \cup \{(i, j)\}$ 
38:   Return:  $\{(i, j) | \#(i, j) \in S \geq \frac{d}{2}\}$ 

```

---

## C IntHT-VR Analysis

Here we proceed to provide theoretical guarantee for Appendix B.

Similar to the definitions for Theorem 3 and Theorem 4, we define  $\Lambda_{2k}$  to be the set of top  $2k$  elements in  $\mathbf{G}_{j+1}^i$ ,  $\Lambda_\Delta$  to be the set of elements in  $\mathbf{G}_{j+1}^i$  whose magnitude is greater than  $\Delta$  and the output set of ATEE to be  $\tilde{\Lambda}$ . We have the support of interest  $\Lambda = \Lambda_{2k} \cap \Lambda_\Delta$  and the number of top- $2k$  elements whose magnitude is below  $\Delta$   $k_\Delta = |\Lambda_{2k} \setminus \Lambda_\Delta|$ . Define  $\mathcal{B}_i$  to be the set of samples used during  $i$ -th outer loop. Recall that  $\eta$  is the step size and  $m$  is the batch size. We then have the following result:

**Theorem 7** (Per-round Convergence of Algorithm 4). *If  $\Lambda \subseteq \tilde{\Lambda}$ , the per-round convergence of Algorithm 4 is as follows:*

$$\mathbb{E}_{\mathcal{B}_i} [F(\Theta_0^{i+1}) - F(\Theta^*)] \leq \kappa_{SVRG} [F(\Theta_0^i) - F(\Theta^*)] + \sigma_{SVRG}$$

where  $\nu = 1 + \frac{\rho + \sqrt{(4+\rho)\rho}}{2}$ ,  $\rho = K/k$ ,  $t$  is the inner round number, and

$$\begin{aligned} \kappa_{SVRG} &= \frac{1}{\alpha_{2k}\nu\eta(1-2\eta L_{2k})t} + \frac{2\eta L_{2k}}{1-2\eta L_{2k}}, \\ \sigma_{SVRG} &= \frac{4\nu\eta\sigma'(4L_{2k}\sqrt{k}\omega + \sigma')t + \frac{2}{\alpha_{2k}}\sqrt{k}\omega\sigma' + t\sigma_{\Delta|SVRG}^2}{2\nu\eta(1-2\eta L_{2k})t}, \\ \sigma' &= \max_{|\Omega|=3k+K} \|\mathcal{P}_\Omega F(\Theta^*)\|_F, \quad \sigma_{\Delta|SVRG}^2 = 4\sqrt{k_\Delta}\eta\sqrt{k}\omega\Delta + 2k_\Delta\eta^2\Delta^2. \end{aligned}$$

To ensure the convergence, it requires that

$$\eta < \frac{1}{4L_{2k}}, \quad \nu < \frac{1}{1 - \eta\alpha_{2k}}.$$

The proof can be found in Appendix F.1.

**Remark 2.** Similar to the Remark 1 case,  $\sigma'$  is statistical error, which in noiseless case are 0. In the case that the magnitude of top- $2k$  elements in the gradient are all greater than  $\Delta$ , we have  $\Lambda_{2k} \subseteq \Lambda_\Delta$  and  $k_\Delta = 0$ , which implies  $\sigma_{\Delta|SVRG} = 0$ .

To obtain the convergence result over all iterations, we adopt the same definition and assumption as in Theorem 7. By setting  $c = \Theta(p)$ ,  $d = 48 \log(ck)$ , we have that the inner loop of Algorithm 4 succeeds with high probability (recall that  $c$  was used to control the failure probability in Theorem 1, and it is not hard to see that the property in Theorem 1 still holds for IntHT-VR). Then we have the following result:

**Theorem 8** (Convergence of IntHT-VR). *Under the same parameter setting as in Theorem 1, with  $d$  specifically defined as above, the convergence of Algorithm 4 is given by*

$$\mathbb{E}_{\mathcal{B}_t} [F(\Theta_0^t) - F(\Theta^*)] \leq \kappa_{SVRG}^s [F(\Theta_0^0) - F(\Theta^*)] + \frac{\sigma_{SVRG}}{1 - \kappa_{SVRG}},$$

where the definitions of  $\kappa_{SVRG}$  and  $\sigma_{SVRG}$  follows from Theorem 7.

*Proof.* Given that ATEE succeeds with high probability, the contraction of each iteration is characterized by Theorem 7. By solving the recursion, we have the desired convergence. ■

**Remark 3.** Here we set ATEE to succeed with high probability, where in Theorem 4 it only requires ATEE to succeed with constant probability. This is because in each inner loop, the iterations share the same hash function  $s, h$  as specified in ATEE, which removes the independence of ATEE for each iteration. Intuitively, once ATEE fails, it could fail on the entire inner loop and ruined the estimation for  $\Theta$ . By setting  $c = \Theta(p)$ , the high probability statement can be obtained without incurring more than  $\mathcal{O}(\log p)$  factor higher complexity.

## D Technical Lemmas and Corollaries

**Lemma 9** (Tight Bound for Hard Thresholding [26]). *Let  $\mathbf{B} \in \mathbb{R}^{p \times p}$  be an arbitrary matrix and  $\boldsymbol{\Theta} \in \mathbb{R}^{p \times p}$  be any  $K$ -sparse signal. For any  $k \geq K$ , we have the following bound:*

$$\|\mathcal{H}_k(\mathbf{B}) - \boldsymbol{\Theta}\|_F \leq \sqrt{\nu} \|\mathbf{B} - \boldsymbol{\Theta}\|_F, \quad \nu = 1 + \frac{\rho + \sqrt{(4 + \rho)\rho}}{2}, \quad \rho = \frac{\min\{K, p^2 - k\}}{k - K + \min\{K, p^2 - k\}}$$

The provide a short proof in Appendix G.1.

**Corollary 10** (similar to co-coercivity). *For a given support set  $\Omega$ , assume that the continuous function  $f(\cdot)$  is  $L_{|\Omega|}$ -RSS and  $K$ -RC. Then, for all matrices  $\boldsymbol{\Theta}, \boldsymbol{\Theta}'$  with  $|\text{supp}(\boldsymbol{\Theta} - \boldsymbol{\Theta}') \cup \Omega| \leq K$ ,*

$$\|\mathcal{P}_\Omega(\nabla f(\boldsymbol{\Theta}') - \nabla f(\boldsymbol{\Theta}))\|_F^2 \leq 2L_{|\Omega|} (f(\boldsymbol{\Theta}') - f(\boldsymbol{\Theta}) - \langle \nabla f(\boldsymbol{\Theta}), \boldsymbol{\Theta}' - \boldsymbol{\Theta} \rangle).$$

The proof can be found in Appendix G.2.

**Corollary 11** (bounding  $\|\mathcal{P}_\Omega(\mathbf{G}^t)\|_2^2$ ). *Let  $\Omega = \text{supp}(\boldsymbol{\Theta}^{t-1}) \cup \text{supp}(\boldsymbol{\Theta}^t) \cup \text{supp}(\boldsymbol{\Theta}^*)$ . For SGD and SVRG, we have the following bound:*

$$1. \text{ SGD: } \mathbf{G}^t = \nabla f_{t_t}(\boldsymbol{\Theta}^{t-1})$$

$$\mathbb{E}_{t_t} \|\mathcal{P}_\Omega(\mathbf{G}^t)\|_F^2 \leq 2L_{2k}^2 \|\boldsymbol{\Theta}^{t-1} - \boldsymbol{\Theta}^*\|_F^2 + 2 \|\mathcal{P}_\Omega(\nabla f_{t_t}(\boldsymbol{\Theta}^*))\|_F^2$$

$$2. \text{ SVRG: } \mathbf{G}_j^i = \nabla f_{b_j}(\boldsymbol{\Theta}_j^i) - \nabla f_{b_j}(\boldsymbol{\Theta}_0^i) + \nabla F(\boldsymbol{\Theta}_0^i)$$

$$\begin{aligned} \mathbb{E}_{b_j} \|\mathcal{P}_\Omega(\mathbf{G}_j^i)\|_F^2 &\leq 4L_{2k} [F(\boldsymbol{\Theta}_j^i) - F(\boldsymbol{\Theta}^*)] + 4L_{2k} [F(\boldsymbol{\Theta}_0^i) - F(\boldsymbol{\Theta}^*)] \\ &\quad - 4L_{2k} \langle \nabla F(\boldsymbol{\Theta}^*), \boldsymbol{\Theta}_j^i + \boldsymbol{\Theta}_0^i - 2\boldsymbol{\Theta}^* \rangle + 4 \|\mathcal{P}_\Omega(\nabla F(\boldsymbol{\Theta}^*))\|_F^2 \end{aligned}$$

The proof can be found in Appendix G.3.

**Corollary 12** (HT property). *Let  $\Lambda_{2k}$  be the support of the top- $2k$  entries in  $\mathbf{G}$  with largest absolute value, for a  $k$ -sparse matrix  $\boldsymbol{\Theta}$ ,*

$$\mathcal{H}_k(\boldsymbol{\Theta} - \eta \mathbf{G}) = \mathcal{H}_k(\boldsymbol{\Theta} - \eta \mathcal{P}_{\text{supp}(\boldsymbol{\Theta}) \cup \Lambda_{2k}}(\mathbf{G}))$$

The proof can be found in Appendix G.4.

**Corollary 13** ( $\Delta$ -Inexact Hard Thresholding). *Define  $\Lambda_\Delta$  to be the set of elements in  $\mathbf{G}_t$  whose magnitude is greater than  $\Delta$ . Further define  $\Lambda = \Lambda_{2k} \cap \Lambda_\Delta, k_\Delta = |\Lambda_{2k} \setminus \Lambda_\Delta|$ . Define,*

$$\tilde{\boldsymbol{\Theta}}^+ = \mathcal{H}_k(\boldsymbol{\Theta} - \eta \mathbf{G}_t)$$

$$\boldsymbol{\Theta}^+ = \mathcal{H}_k(\boldsymbol{\Theta} - \eta \mathcal{P}_{\tilde{\Lambda} \cup \text{supp}(\boldsymbol{\Theta})}(\mathbf{G}_t))$$

*In the case  $\Lambda_\Delta \subseteq \tilde{\Lambda}$  and  $\Lambda_\Delta \subseteq \tilde{\Lambda}$ , we have the bound,*

$$\|\boldsymbol{\Theta}^+ - \tilde{\boldsymbol{\Theta}}^+\|_F \leq \eta \Delta \sqrt{2k_\Delta}$$

The proof can be found in Appendix G.5.

## E Proofs for Section 4

### E.1 Proof of Theorem 1

*Proof.* The proof of Theorem 1 heavily relies on the analysis in [21]. Given that  $\nabla f_{\mathcal{B}_i}(\boldsymbol{\Theta})$  can be expressed as multiplication of two matrices, we slightly abuse the notation  $\mathbf{A}, \mathbf{B}$  to denote the pair of matrices that  $\mathbf{AB}^\top = \nabla f_{\mathcal{B}_i}(\boldsymbol{\Theta})$ .

Denote the output of COMPRESSED-PRODUCT as  $\mathbf{s}$ . Define the hash function  $h_1, h_2 : [p] \rightarrow [b]$  and  $s_1, s_2 : [p] \rightarrow \{-1, 1\}$ . Let  $h$  be the hash function that satisfies  $h(i, j) = h_1(i) + h_2(j) \bmod b$ , and  $s$  be  $s(i, j) = s_1(i)s_2(j)$ . Let  $\mathbf{1}_{i,j}^q$  be the indicator of event  $\{h(i, j) = q\}$ . Define the index set

of the top  $2k$  elements (with largest abstract value) of  $\mathbf{AB}^\top$  to be  $\Psi_{2k}$ . Denote the index set of the elements with absolute value greater than  $\Delta$  as  $\Psi_\Delta$ . Let  $\Psi = \Psi_{2k} \cap \Psi_\Delta$ , and we are interested in finding all indices in  $\Psi$ .

Our proof consists of the following four main steps.

**Step I:** Bound the variance of a single decoded entry.

$$\mathbf{s}_q = \sum_{(i,j) \in [p] \times [p]} \mathbf{1}_{i,j}^q s(i,j) (\mathbf{AB}^\top)_{ij}$$

For  $(i^*, j^*) \in \Psi$ , with  $q^* = h(i^*, j^*)$  we have:

$$\mathbf{s}_{q^*} = s(i^*, j^*) (\mathbf{AB}^\top)_{i^* j^*} + \sum_{(i,j) \neq (i^*, j^*), (i,j) \in [p] \times [p]} \mathbf{1}_{i,j}^{q^*} s(i,j) (\mathbf{AB}^\top)_{ij}$$

Then,

$$\begin{aligned} |\mathbf{s}_{q^*}| &\geq s(i^*, j^*) \text{sign} \left( (\mathbf{AB}^\top)_{i^* j^*} \right) \mathbf{s}_{q^*} \\ &= |(\mathbf{AB}^\top)_{i^* j^*}| + s(i^*, j^*) \text{sign} \left( (\mathbf{AB}^\top)_{i^* j^*} \right) \sum_{(i,j) \neq (i^*, j^*), (i,j) \in [p] \times [p]} \mathbf{1}_{i,j}^{q^*} s(i,j) (\mathbf{AB}^\top)_{ij} \end{aligned}$$

Let  $\mathbf{s}'_{q^*} = s(i^*, j^*) \text{sign} \left( (\mathbf{AB}^\top)_{i^* j^*} \right) \sum_{(i,j) \neq (i^*, j^*), (i,j) \in [p] \times [p]} \mathbf{1}_{i,j}^{q^*} s(i,j) (\mathbf{AB}^\top)_{ij}$ . We have:

$$\mathbb{P}(\text{error in one bit}) \leq \mathbb{P} \left( |\mathbf{s}'_{q^*}| \geq \frac{\Delta}{2} \right) \leq \frac{4\text{var}(\mathbf{s}'_{q^*})}{\Delta^2}$$

Taking expectation over all possible partitions (based on  $h$ ), we have:

$$\mathbb{E}_h [\text{var}(\mathbf{s}'_{q^*})] = \frac{1}{b} \sum_{(i,j) \neq (i^*, j^*), (i,j) \in [p] \times [p]} (\mathbf{AB}^\top)_{ij}^2 \leq \frac{\|\mathbf{AB}^\top\|_F^2}{b}.$$

**Step II:** Bound the failure probability of recovering a single large entry.

By Markov's inequality, we have

$$\mathbb{P} \left( \text{var}(\mathbf{s}'_{q^*}) \geq \frac{c \|\mathbf{AB}^\top\|_F^2}{b} \right) \leq \frac{1}{c}.$$

Given the upper bound on  $\text{var}(\mathbf{s}'_{q^*})$ , which happens with probability at least  $1 - \frac{1}{c}$  due to the randomness from  $h$ , the only left randomness comes from  $s(i, j)$ . Note that we use the same  $h$  for every  $t$ . Then,

$$\mathbb{P} \left( |\mathbf{s}'_{q^*}| \geq \frac{\Delta}{2} \right) \leq \frac{4c}{\Delta^2} \frac{\|\mathbf{AB}^\top\|_F^2}{b}$$

The above inequality gives an error bound for each bit in the error-correcting code. Thus for a length  $l$  code, the expected number of wrong bits is:

$$\mathbb{E}[\text{number of wrong bits}] = \sum_{r=0}^{2l-1} \mathbb{P}(\text{the } r^{\text{th}} \text{ bit is wrong}) \leq \frac{4lc}{\Delta^2} \frac{\|\mathbf{AB}^\top\|_F^2}{b}$$

By using an expander code, we can tolerate a constant fraction of error  $\delta$  which is independent of message length  $\log p$ , with a code length  $l = \mathcal{O}(\log p)$  [28]. By Markov's inequality, and combining with the probability bound on  $h$ ,

$$\mathbb{P}((i^*, j^*) \text{ not recovered}) \leq \mathbb{P}(\text{more than } \delta l \text{ wrong bits}) \leq \frac{4c}{\Delta^2} \frac{\|\mathbf{AB}^\top\|_F^2}{b\delta} + \frac{1}{c}$$

Optimizing over the constant  $c$  (by setting  $c = \frac{\Delta\sqrt{b\delta}}{2\|\mathbf{AB}^\top\|_F}$ ), we have

$$\mathbb{P}((i^*, j^*) \text{ not recovered}) \leq \frac{4}{\Delta} \frac{\|\mathbf{AB}^\top\|_F}{\sqrt{b\delta}}$$

By choosing  $b \geq \frac{144\|\mathbf{AB}^\top\|_F^2}{\Delta^2\delta}$ , we have

$$\mathbb{P}((i^*, j^*) \text{ not recovered}) \leq \frac{1}{3}.$$

For simplicity, we take  $\delta = \frac{1}{3}$ . Combining the assumption that  $\|\mathbf{AB}^\top\|_F = \|\nabla f_{\mathcal{B}_i}(\Theta)\|_F$ . Taking  $\Delta \geq \|\nabla f_{\mathcal{B}}(\Theta)\|_F / \sqrt{2k}$ , which implies  $b \geq \frac{432\|\nabla f_{\mathcal{B}_i}(\Theta)\|_F^2}{\Delta^2}$  will give a constant probability to successfully recover  $(i^*, j^*)$ .

**Step III:** Union bound over all large entries. Repeat the count sketch and sub-linear extraction for  $d$  times and take the  $(i, j)$  pair that are recovered more than  $d/2$  times, we have that

$$\mathbb{P}((i^*, j^*) \text{ not recovered for more than } d/2 \text{ times}) \leq \exp\left(-\frac{d}{48}\right).$$

Since the events of recovering different  $(i, j) \in \Psi$  are not independent (because of the dependency induced by  $h$  functions), we use union bound over all the elements in  $\Psi$ . Thus we have

$$\mathbb{P}(\Psi \text{ not recovered}) \leq |\Psi| \exp\left(-\frac{d}{48}\right) \leq 2k \exp\left(-\frac{d}{48}\right)$$

By taking  $d = 48 \log(2ck)$ , we obtain the desired constant success rate  $1 - \frac{1}{c}$  for recovering  $\Psi$ .

**Step IV:** For the overall time complexity of the Interaction Top Elements Extraction (ATEE), encoding the index will take  $\mathcal{O}(pl)$ . Each compressed product step will take  $\mathcal{O}(mp + mb \log b)$  and it will be repeatedly calculated for  $2l$  times, where  $l$  is the length of the expander code. Given that expander code has a linear decoding complexity, thus the extraction step can be done with  $\mathcal{O}(bl)$ . The above mentioned procedure will be repeated for  $d$  times. Putting everything together, we have the time complexity for ATEE is

$$\mathcal{O}\left(\underbrace{\log(ck)}_{\text{repeat } d \text{ times}} \left[ \underbrace{p \log(p) + b \log(p)}_{\text{encode \& decode}} + \underbrace{\log(p) [mp + mb \log(b)]}_{\text{compressed product}} \right]\right)$$

which achieves sub-quadratic time complexity. Ignoring the logarithm term, the time complexity is  $\tilde{\mathcal{O}}(m(p+b))$ , which naturally implies that the space complexity is  $\tilde{\mathcal{O}}(m(p+b))$ .  $\blacksquare$

## E.2 Proof of Lemma 2

*Proof.* By RSM, we have

$$\|\nabla f_{\mathcal{B}_i}(\Theta) - \nabla f_{\mathcal{B}_i}(\Theta^*)\|_F \leq L_{2k} \|\Theta - \Theta^*\|_F, \quad \forall \Theta \text{ s.t. } |\text{supp}(\Theta) \cup \text{supp}(\Theta^*)| \leq 2k$$

By triangle inequality,

$$\|\nabla f_{\mathcal{B}_i}\|_F \leq L_{2k} \|\Theta - \Theta^*\|_F + \|\nabla f_{\mathcal{B}_i}(\Theta^*)\|_F$$

By the fact that  $\|\Theta\|_F \leq \sqrt{k}\omega$ , the first term can be directly bounded by  $L_{2k} \|\Theta - \Theta^*\|_F \leq 2L_{2k}\sqrt{k}\omega$ . For the last term we have  $\|\nabla f_{\mathcal{B}_i}(\Theta^*)\|_F \leq G$ . Thus we have,

$$\|\nabla f_{\mathcal{B}_i}(\Theta)\|_F \leq 2L_{2k}\sqrt{k}\omega + G$$

$\blacksquare$

### E.3 Proof of Theorem 3

*Proof.*

With stochastic gradient descent, we have  $\mathbf{G}^t = \nabla f_{\mathcal{B}_t}(\boldsymbol{\Theta}^{t-1})$  as the gradient at step  $t$ . The per-round convergence can be separately analyzed for the two cases.

**ATEE succeeds:**  $\Lambda \subseteq \tilde{\Lambda}$ . Before analyzing  $\boldsymbol{\Theta}^t$ , we first construct an intermediate parameter  $\tilde{\boldsymbol{\Theta}}^t$  as,

$$\tilde{\boldsymbol{\Theta}}^t = \mathcal{H}_k(\boldsymbol{\Theta}^{t-1} - \eta \mathcal{P}_{\Lambda_{2k} \cup \text{supp}(\boldsymbol{\Theta}^{t-1})}(\mathbf{G}^t)) = \mathcal{H}_k(\boldsymbol{\Theta}^{t-1} - \eta \mathbf{G}^t)$$

The second inequality directly comes from Corollary 12. This is actually the best situation we can hope for. In this situation, the approximation projection in ATEE doesn't affect the update. We will start with the bound on  $\|\tilde{\boldsymbol{\Theta}}^t - \boldsymbol{\Theta}^*\|_F^2$ .  $\boldsymbol{\Theta}^t$  will then be compared with  $\tilde{\boldsymbol{\Theta}}^t$  to obtain the error bound. We will never refer to  $\tilde{\boldsymbol{\Theta}}^t$  in practice, but this construction makes the proof much clear. Consider the proxy

$$\mathbf{Z}^t = \boldsymbol{\Theta}^{t-1} - \eta \mathbf{G}^t$$

Let  $\Omega = \text{supp}(\boldsymbol{\Theta}^{t-1}) \cup \text{supp}(\tilde{\boldsymbol{\Theta}}^t) \cup \text{supp}(\boldsymbol{\Theta}^*)$ ,

$$\|\tilde{\boldsymbol{\Theta}}^t - \boldsymbol{\Theta}^*\|_F^2 = \|\mathcal{H}_k(\mathbf{Z}^t) - \boldsymbol{\Theta}^*\|_F^2 = \|\mathcal{H}_k(\mathcal{P}_\Omega(\mathbf{Z}^t)) - \boldsymbol{\Theta}^*\|_F^2 \leq \nu \|\mathcal{P}_\Omega(\mathbf{Z}^t) - \boldsymbol{\Theta}^*\|_F^2 \quad (3)$$

Notice that

$$\|\mathcal{P}_\Omega(\mathbf{Z}^t) - \boldsymbol{\Theta}^*\|_F^2 \quad (4)$$

$$\begin{aligned} &= \|\boldsymbol{\Theta}^{t-1} - \boldsymbol{\Theta}^* - \eta \mathcal{P}_\Omega(\mathbf{G}^t)\|_F^2 \\ &\leq \|\boldsymbol{\Theta}^{t-1} - \boldsymbol{\Theta}^*\|_F^2 + \eta^2 \|\mathcal{P}_\Omega(\mathbf{G}^t)\|_F^2 - 2\eta \langle \boldsymbol{\Theta}^{t-1} - \boldsymbol{\Theta}^*, \mathbf{G}^t \rangle \end{aligned} \quad (5)$$

Notice that  $\mathbb{E}[\mathbf{G}^t] = \nabla F(\boldsymbol{\Theta}^{t-1})$ . Equation (5) includes three terms: (i) the first term is the contraction term which will be kept, (ii) the second term is controlled by first using Corollary 11 then taking expectation, and (iii) the third term is controlled by first taking the expectation and then using the RSC property. Therefore,

$$\begin{aligned} &\mathbb{E}_{\mathcal{B}_t} \left[ \|\tilde{\boldsymbol{\Theta}}^t - \boldsymbol{\Theta}^*\|_F^2 \right] \\ &\leq \mathbb{E}_{\mathcal{B}_t} \left[ \nu \|\boldsymbol{\Theta}^{t-1} - \boldsymbol{\Theta}^*\|_F^2 + \nu \eta^2 \|\mathcal{P}_\Omega(\mathbf{G}^t)\|_F^2 - 2\nu \eta \langle \boldsymbol{\Theta}^{t-1} - \boldsymbol{\Theta}^*, \mathbf{G}^t \rangle \right] \\ &\stackrel{(a)}{\leq} \nu \|\boldsymbol{\Theta}^{t-1} - \boldsymbol{\Theta}^*\|_F^2 - 2\nu \eta \langle \boldsymbol{\Theta}^{t-1} - \boldsymbol{\Theta}^*, \nabla F(\boldsymbol{\Theta}^{t-1}) \rangle \\ &\quad + \nu \eta^2 \left[ 2L_{2k}^2 \|\boldsymbol{\Theta}^{t-1} - \boldsymbol{\Theta}^*\|_F^2 + 2\mathbb{E}_{\mathcal{B}_t} \left[ \|\mathcal{P}_\Omega \nabla f_{\mathcal{B}_t}(\boldsymbol{\Theta}^*)\|_F^2 \right] \right] \\ &= \nu \|\boldsymbol{\Theta}^{t-1} - \boldsymbol{\Theta}^*\|_F^2 + \nu \eta^2 \left[ 2L_{2k}^2 \|\boldsymbol{\Theta}^{t-1} - \boldsymbol{\Theta}^*\|_F^2 + 2\mathbb{E}_{\mathcal{B}_t} \left[ \|\mathcal{P}_\Omega \nabla f_{\mathcal{B}_t}(\boldsymbol{\Theta}^*)\|_F^2 \right] \right] \\ &\quad - 2\nu \eta \langle \boldsymbol{\Theta}^{t-1} - \boldsymbol{\Theta}^*, \nabla F(\boldsymbol{\Theta}^{t-1}) - \nabla F(\boldsymbol{\Theta}^*) \rangle + 2\nu \eta \langle \boldsymbol{\Theta}^{t-1} - \boldsymbol{\Theta}^*, \nabla F(\boldsymbol{\Theta}^*) \rangle \\ &\stackrel{(b)}{\leq} \nu \|\boldsymbol{\Theta}^{t-1} - \boldsymbol{\Theta}^*\|_F^2 + \nu \eta^2 \left[ 2L_{2k}^2 \|\boldsymbol{\Theta}^{t-1} - \boldsymbol{\Theta}^*\|_F^2 + 2\mathbb{E}_{\mathcal{B}_t} \left[ \|\mathcal{P}_\Omega \nabla f_{\mathcal{B}_t}(\boldsymbol{\Theta}^*)\|_F^2 \right] \right] \\ &\quad - 2\nu \eta \alpha_{2k} \|\boldsymbol{\Theta}^{t-1} - \boldsymbol{\Theta}^*\|_F^2 + 2\nu \eta \|\boldsymbol{\Theta}^{t-1} - \boldsymbol{\Theta}^*\|_F \|\mathcal{P}_\Omega \nabla F(\boldsymbol{\Theta}^*)\|_F \\ &= \nu (1 - 2\eta \alpha_{2k} + 2\eta^2 L_{2k}^2) \|\boldsymbol{\Theta}^{t-1} - \boldsymbol{\Theta}^*\|_F^2 \\ &\quad + 2\nu \eta \|\boldsymbol{\Theta}^{t-1} - \boldsymbol{\Theta}^*\|_F \|\mathcal{P}_\Omega(\nabla F(\boldsymbol{\Theta}^*))\|_F + 2\nu \eta^2 \mathbb{E}_{\mathcal{B}_t} \|\mathcal{P}_\Omega(\nabla f_{\mathcal{B}_t}(\boldsymbol{\Theta}^*))\|_F^2 \end{aligned}$$

where the first inequality is due to Equation (3) and Equation (5). (a) plugs in the result from Corollary 11 and takes expectation over the gradient. (b) uses RSC property and Cauchy-Shwartz inequality.

Suppose each coordinate of  $\boldsymbol{\Theta}$  is bounded by  $\omega$ , we know that  $\|\boldsymbol{\Theta}^{t-1}\|_F \leq \sqrt{k}\omega$  and  $\|\boldsymbol{\Theta}^*\|_F \leq \sqrt{k}\omega$ , we further have

$$\begin{aligned} \mathbb{E}_{\mathcal{B}_t} \left[ \|\tilde{\boldsymbol{\Theta}}^t - \boldsymbol{\Theta}^*\|_F^2 \right] &\leq \nu (1 - 2\eta \alpha_{2k} + 2\eta^2 L_{2k}^2) \|\boldsymbol{\Theta}^{t-1} - \boldsymbol{\Theta}^*\|_F^2 \\ &\quad + 4\nu \eta \sqrt{k}\omega \|\mathcal{P}_\Omega(\nabla F(\boldsymbol{\Theta}^*))\|_F + 2\nu \eta^2 \mathbb{E}_{\mathcal{B}_t} \|\mathcal{P}_\Omega(\nabla f_{\mathcal{B}_t}(\boldsymbol{\Theta}^*))\|_F^2 \end{aligned}$$

where the second line in the statistical error in SGD. With the definition of  $\kappa_1, \sigma_{GD}^2$ ,

$$\mathbb{E}_{\mathcal{B}_t} \left[ \left\| \tilde{\Theta}^t - \Theta^* \right\|_F^2 \right] \leq \kappa_1 \left\| \Theta^{t-1} - \Theta^* \right\|_F^2 + \sigma_{GD}^2$$

Now we turn to  $\Theta^t$  which is given by

$$\Theta^t = \mathcal{H}_k \left( \Theta^{t-1} - \eta \mathcal{P}_{\tilde{\Lambda} \cup \text{supp}(\Theta^{t-1})}(\mathbf{G}_t) \right)$$

It is very similar to  $\tilde{\Theta}^t$ , except that  $\Lambda_{2k}$  is replaced by  $\tilde{\Lambda}$ , which is the support we actually obtain. By definition, we have either  $\Lambda_\Delta \subseteq \Lambda_{2k}$  or  $\Lambda_{2k} \subseteq \Lambda_\Delta$ . Recall that  $\Lambda = \Lambda_{2k} \cap \Lambda_\Delta$  and in this case where ATEE recovers  $\Lambda$ , we have  $\Lambda \subseteq \tilde{\Lambda}$ . Thus it is either  $\Lambda_{2k} \subseteq \tilde{\Lambda}$  or  $\Lambda_\Delta \subseteq \tilde{\Lambda}$ .

1.  $\Lambda_{2k} \subseteq \tilde{\Lambda}$ . In this case, simply applying corollary 12 with  $G = \mathcal{P}_{\tilde{\Lambda} \cup \text{supp}(\Theta^{t-1})}(\mathbf{G}_t)$ , we have

$$\Theta^t = \mathcal{H}_k \left( \Theta^{t-1} - \eta \mathcal{P}_{\tilde{\Lambda} \cup \text{supp}(\Theta^{t-1})}(\mathbf{G}_t) \right) = \mathcal{H}_k \left( \Theta^{t-1} - \eta \mathcal{P}_{\Lambda_{2k} \cup \text{supp}(\Theta^{t-1})}(\mathbf{G}_t) \right) = \tilde{\Theta}^t$$

Also, by  $\Lambda_{2k} \subseteq \Lambda_\Delta$ , we know that  $k_\Delta = |\Lambda_{2k} \setminus \Lambda_\Delta| = 0$ , which indicates  $\sigma_{\Delta|GD}^2 = 0$ .

2.  $\Lambda_\Delta \subseteq \tilde{\Lambda}$ . Here we can apply Corollary 13 and have,

$$\left\| \Theta^t - \tilde{\Theta}^t \right\|_F \leq 2\eta\Delta\sqrt{k_\Delta}, \quad \left\| \Theta^t - \tilde{\Theta}^t \right\|_F^2 \leq 2\eta^2\Delta^2k_\Delta$$

Thus, we can bound the error  $\mathbb{E}_{\mathcal{B}_t} \left[ \left\| \Theta^t - \Theta^* \right\|_F^2 \right]$  as,

$$\begin{aligned} \mathbb{E}_{\mathcal{B}_t} \left[ \left\| \Theta^t - \Theta^* \right\|_F^2 \right] &= \mathbb{E}_{\mathcal{B}_t} \left[ \left\| \tilde{\Theta}^t - \Theta^* \right\|_F^2 \right] + 2\mathbb{E}_{\mathcal{B}_t} \left[ \left\langle \tilde{\Theta}^t - \Theta^*, \Theta^t - \tilde{\Theta}^t \right\rangle \right] + \mathbb{E}_{\mathcal{B}_t} \left[ \left\| \Theta^t - \tilde{\Theta}^t \right\|_F^2 \right] \\ &\leq \mathbb{E}_{\mathcal{B}_t} \left[ \left\| \tilde{\Theta}^t - \Theta^* \right\|_F^2 \right] + 4\sqrt{k_\Delta}\eta\sqrt{k}\omega\Delta + 2k_\Delta\eta^2\Delta^2 \\ &= \mathbb{E}_{\mathcal{B}_t} \left[ \left\| \tilde{\Theta}^t - \Theta^* \right\|_F^2 \right] + \sigma_{\Delta|GD}^2 \end{aligned}$$

Combining the two cases above, we have the desired convergence rate for  $\Lambda \subseteq \tilde{\Lambda}$ .

**ATEE fails:**  $\Lambda \not\subseteq \tilde{\Lambda}$ . This is the worst case when support recovery completely fails and we have no control over  $\tilde{\Lambda}$ . The update in this case is

$$\Theta^t = \mathcal{H}_k \left( \tilde{\mathbf{Z}}^t \right), \quad \mathbf{Z}^t = \Theta^{t-1} - \eta \left[ \mathbf{G}^t - \mathcal{P}_{\tilde{\Lambda}^C \setminus \text{supp}(\Theta^{t-1})}(\mathbf{G}^t) \right]$$

Similar as the previous case, let  $\Omega = \text{supp}(\Theta^{t-1}) \cup \text{supp}(\Theta^t) \cup \text{supp}(\Theta^*)$ , we have

$$\left\| \Theta^t - \Theta^* \right\|_F^2 \leq \nu \left\| \mathcal{P}_\Omega(\mathbf{Z}^t) - \Theta^* \right\|_F^2$$

and

$$\begin{aligned} \left\| \mathcal{P}_\Omega(\mathbf{Z}^t) - \Theta^* \right\|_F^2 &\leq \left\| \Theta^{t-1} - \Theta^* \right\|_F^2 + \eta^2 \left\| \mathcal{P}_\Omega \left( \mathbf{G}^t - \mathcal{P}_{\tilde{\Lambda}^C \setminus \text{supp}(\Theta^{t-1})}(\mathbf{G}^t) \right) \right\|_F^2 \\ &\quad - 2\eta \left\langle \Theta^{t-1} - \Theta^*, \mathcal{P}_\Omega(\mathbf{G}^t) \right\rangle \\ &\quad + 2\eta \left\langle \Theta^{t-1} - \Theta^*, \mathcal{P}_\Omega \mathcal{P}_{\tilde{\Lambda} \setminus \text{supp}(\Theta^{t-1})}(\mathbf{G}^t) \right\rangle \\ &\leq \left\| \Theta^{t-1} - \Theta^* \right\|_F^2 + \eta^2 \left\| \mathcal{P}_\Omega(\mathbf{G}^t) \right\|_F^2 - 2\eta \left\langle \Theta^{t-1} - \Theta^*, \mathcal{P}_\Omega(\mathbf{G}^t) \right\rangle \\ &\quad + 2\eta \left\langle \Theta^{t-1} - \Theta^*, \mathcal{P}_\Omega \mathcal{P}_{\tilde{\Lambda} \setminus \text{supp}(\Theta^{t-1})}(\mathbf{G}^t) \right\rangle \end{aligned}$$

The bound for the first three terms are same as the bound for Equation (5). It left to bound the last term,

$$\begin{aligned}
& \left\langle \Theta^{t-1} - \Theta^*, \mathcal{P}_\Omega \mathcal{P}_{\tilde{\Lambda} \setminus \text{supp}(\Theta^{t-1})}(\mathbf{G}^t) \right\rangle \\
& \leq \|\Theta^{t-1} - \Theta^*\|_F \left\| \mathcal{P}_\Omega \mathcal{P}_{\tilde{\Lambda} \setminus \text{supp}(\Theta^{t-1})}(\nabla f_{\mathcal{B}_t}(\Theta^{t-1})) \right\|_F \\
& \leq \|\Theta^{t-1} - \Theta^*\|_F \left\| \mathcal{P}_\Omega(\nabla f_{\mathcal{B}_t}(\Theta^{t-1}) - \nabla f_{\mathcal{B}_t}(\Theta^*)) \right\|_F + \|\Theta^{t-1} - \Theta^*\|_F \left\| \mathcal{P}_\Omega(\nabla f_{\mathcal{B}_t}(\Theta^*)) \right\|_F \\
& \leq \|\Theta^{t-1} - \Theta^*\|_F \left\| \nabla f_{\mathcal{B}_t}(\Theta^{t-1}) - \nabla f_{\mathcal{B}_t}(\Theta^*) \right\|_F + \|\Theta^{t-1} - \Theta^*\|_F \left\| \mathcal{P}_\Omega(\nabla f_{\mathcal{B}_t}(\Theta^*)) \right\|_F \\
& \leq L_{2k} \|\Theta^{t-1} - \Theta^*\|_F^2 + 2\sqrt{k}\omega \left\| \mathcal{P}_\Omega(\nabla f_{\mathcal{B}_t}(\Theta^*)) \right\|_F
\end{aligned}$$

Putting the bounds together, we have

$$\begin{aligned}
\mathbb{E}_{\mathcal{B}_t} \left[ \|\Theta^t - \Theta^*\|_F^2 \right] & \leq \nu (1 - 2\eta\alpha_{2k} + 2\eta^2 L_{2k}^2 + 2\eta L_{2k}) \|\Theta^{t-1} - \Theta^*\|_F^2 \\
& \quad + 4\nu\eta\sqrt{k}\omega \left\| \mathcal{P}_\Omega(\nabla f(\Theta^*)) \right\|_F + 2\nu\eta^2 \mathbb{E}_{\mathcal{B}_t} \left\| \mathcal{P}_\Omega(\nabla f_{\mathcal{B}_t}(\Theta^*)) \right\|_F^2 \\
& \quad + 4\nu\eta\sqrt{k}\omega \mathbb{E}_{\mathcal{B}_t} \left\| \mathcal{P}_\Omega(\nabla f_{\mathcal{B}_t}(\Theta^*)) \right\|_F
\end{aligned}$$

Define  $\sigma_{Fail|GD}^2 = \max_{|\Omega| \leq 2k+K} \left[ 4\nu\eta\sqrt{k}\omega \mathbb{E}_{\mathcal{B}_t} \left[ \left\| \mathcal{P}_\Omega(\nabla f_{\mathcal{B}_t}(\Theta^*)) \right\|_F \right] \right]$  Then,

$$\mathbb{E}_{\mathcal{B}_t} \left[ \|\Theta^t - \Theta^*\|_F^2 \right] \leq \nu (1 - 2\eta\alpha_{2k} + 2\eta^2 L_{2k}^2 + 2\eta L_{2k}) \|\Theta^{t-1} - \Theta^*\|_F^2 + \sigma_{GD}^2 + \sigma_{Fail|GD}^2$$

■

#### E.4 Proof of Theorem 4

*Proof.* With the definition of  $\sigma_1^2, \sigma_2^2, \kappa_1, \kappa_2$ , the per-round convergence result of Theorem 3 can be rewritten as:

1. Success Case:

$$\mathbb{E}_{\mathcal{B}_{t+1}} \left[ \|\Theta^{t+1} - \Theta^*\|_F^2 + \frac{\sigma_1^2}{\kappa_1 - 1} \right] \leq \kappa_1 \mathbb{E}_{\mathcal{B}_t} \left[ \|\Theta^t - \Theta^*\|_F^2 + \frac{\sigma_1^2}{\kappa_1 - 1} \right]$$

2. Failure Case:

$$\mathbb{E}_{\mathcal{B}_{t+1}} \left[ \|\Theta^{t+1} - \Theta^*\|_F^2 + \frac{\sigma_1^2}{\kappa_1 - 1} \right] \leq \kappa_2 \mathbb{E}_{\mathcal{B}_t} \left[ \|\Theta^t - \Theta^*\|_F^2 + \frac{\sigma_1^2}{\kappa_1 - 1} \right] + (\kappa_2 - 1) \left( \frac{\sigma_2^2}{\kappa_2 - 1} - \frac{\sigma_1^2}{\kappa_1 - 1} \right)$$

For each iteration, the count sketch succeeds with probability  $1 - \frac{1}{c}$ . Denote the success indicator at iteration  $t$  as  $\phi_t$ , and let  $\Phi_t = \{\phi_0, \phi_1, \dots, \phi_t\}$ , we can combine those two cases and obtain,

$$\begin{aligned}
\mathbb{E}_{\mathcal{B}_{t+1}, \Phi_{t+1}} \left[ \|\Theta^{t+1} - \Theta^*\|_F^2 + \frac{\sigma_1^2}{\kappa_1 - 1} \right] & \leq \left( \kappa_1 + \frac{1}{c} (\kappa_1 - \kappa_2) \right) \mathbb{E}_{\mathcal{B}_t, \Phi_t} \left[ \|\Theta^t - \Theta^*\|_F^2 + \frac{\sigma_1^2}{\kappa_1 - 1} \right] \\
& \quad + \frac{1}{c} (\kappa_2 - 1) \left( \frac{\sigma_2^2}{\kappa_2 - 1} - \frac{\sigma_1^2}{\kappa_1 - 1} \right)
\end{aligned}$$

With a telescope sum, we have the desired error bound. ■

#### E.5 Proof of Theorem 5

*Proof.* We first vectorize the quadratic features. For an arbitrary data point  $\mathbf{x}, y$ , we know that  $\mathbf{x} \in \mathbb{R}^p$ , where the first  $p-1$  coordinates independently come from a zero mean, bounded distribution and the last coordinate is a constant 1. Denote the  $i$ -th coordinate of  $\mathbf{x}$  as  $x_i$ , we first vectorize the quadratic features, define

$$\mathbf{v} = [x_1 x_2, x_1 x_3, \dots, x_{p-1} x_p]^\top$$

Here, for the quadratic terms, we only consider the interaction terms with no squared terms like  $x_i^2$ . Given that there will only be  $p$  different squared terms, one can regress with the squared terms first, and the residual model will have no dependency on the squared terms. Replace  $x_p$  with 1, we have

$$\mathbf{v} = [x_1x_2, x_1x_3, \dots, x_{p-2}x_{p-1}, x_1, \dots, x_{p-1}]^\top$$

Given that  $x_1, \dots, x_{p-1}$  are all i.i.d. and zero mean, after normalizing the variance of  $x_i$ , it is not hard to verify that

$$\mathbb{E}[\mathbf{v}\mathbf{v}^\top] = \mathbf{I}$$

Given that  $\alpha, L$  are the smallest and largest eigenvalue of  $\mathbb{E}[\mathbf{v}\mathbf{v}^\top]$ , asymptotically, we have the strong convexity and smoothness parameter  $\alpha = L = 1$ , which directly implies that the restricted version  $\alpha_k = L_k = 1$ . Thus the deterministic requirement can be easily satisfied with infinite sample. Now we turn to the minimum sample we need to have the desired  $\alpha_k, L_k$ .

To show the  $k$ -restricted strong convexity and smoothness, we will first focus on an arbitrary  $k$  sub-matrix of  $\mathbb{E}[\mathbf{v}\mathbf{v}^\top]$  and show the concentration. Then the desired claim will follow by applying a union bound over all  $k$  sub-matrices.

Denote a set of indices  $\mathcal{S} \subseteq \{1, \dots, |\mathbf{v}|\}$ , where  $|\mathcal{S}| = k$ . Define the corresponding sub-vector drawn from  $\mathbf{v}$  as  $\mathbf{z} = \mathbf{v}_{\mathcal{S}}$ . Define the restricted expected Hessian matrix as  $\mathbf{H} = \mathbb{E}[\mathbf{z}\mathbf{z}^\top]$ , let the finite sample Hessian matrix as  $\hat{\mathbf{H}} = \frac{1}{m} \sum_{i=1}^m \mathbf{z}_i \mathbf{z}_i^\top$ . Denote the difference as

$$\begin{aligned} \mathbf{D}_i &= \frac{1}{m} \mathbf{z}_i \mathbf{z}_i^\top - \frac{1}{m} \mathbb{E}[\mathbf{z}\mathbf{z}^\top] \\ \mathbf{D} &= \sum_{i=1}^m \mathbf{D}_i = \frac{1}{m} \sum_{i=1}^m \mathbf{z}_i \mathbf{z}_i^\top - \mathbb{E}[\mathbf{z}\mathbf{z}^\top] = \hat{\mathbf{H}} - \mathbf{H} \end{aligned}$$

Given that  $\mathbf{H} = \mathbf{I}$ , we can show the concentration of  $\alpha_k, L_k$  as long as we can control  $\mathbf{D}$ . Given that  $\mathbf{v}$  is bounded, we know that  $\mathbf{v}$  is sub-gaussian. Thus, bounding  $\|\mathbf{D}\|$  is equivalent to showing concentration of the covariance matrix estimation of sub-gaussian random vectors. Using the Corollary 5.50 in [30], we have that with  $m \geq C(t/\epsilon)^2 k$ , where  $C$  depends only on the sub-gaussian norm  $\|\mathbf{v}\|_{\psi_2}$ . It's not hard to verify that  $\|\mathbf{v}\|_{\psi_2} \leq B$ . Then we have that

$$\mathbb{P}(\|\mathbf{D}\| \geq \epsilon) \leq 2 \exp(-t^2 k)$$

Thus we obtain the bound for one particular  $k$ -sub-matrix. Taking an union bound over all  $k$ -sub-matrices, we have that

$$\begin{aligned} \mathbb{P}(L_k \geq 1 + \epsilon) &\leq \binom{|\mathbf{v}|}{k} \mathbb{P}(\|\mathbf{D}\| \geq \epsilon) \\ &\leq \exp(k \log(2ep^2/k) - t^2 k) \end{aligned}$$

By choosing  $t^2 \geq \log(p)$ , which implies that  $m \gtrsim Bk \log(p)/\epsilon^2$ , we have  $L_k \leq 1 + \epsilon$  with high probability. With a symmetric argument, we know that under same condition, we have  $\alpha_k \geq 1 - \epsilon$  with high probability. ■

## E.6 Proof of Corollary 6

*Proof.* With Theorem 4 showing the linear convergence, we know that the per iteration complexity dominates the overall complexity of IntHT. By Theorem 1 and Lemma 2, we show setting  $b$  to  $\mathcal{O}(k)$  is sufficient for ATEE to recover the support. Theorem 5 provides that the minimum batch size  $m$  required for quadratic regression is  $\mathcal{O}(k \log p)$ . Combining those results, we conclude that the complexity of IntHT is  $\tilde{\mathcal{O}}(k(k+p))$ . In the regime when  $k$  is  $\mathcal{O}(p^\gamma)$  for  $\gamma < 1$ , IntHT achieves sub-quadratic complexity. ■

## F Proofs for Appendix C

### F.1 Proof of Theorem 7

*Proof.* Similar to the ATEE **succeeds** case, define

$$\tilde{\Theta}_{j+1}^i = \mathcal{H}_k \left( \Theta_j^i - \eta \mathcal{P}_{\Lambda_{2k} \cup \text{supp}(\Theta_j^i)} (\mathbf{G}_j^i) \right) = \mathcal{H}_k (\Theta_j^i - \eta \mathbf{G}_j^i)$$

The second equality is given by Corollary 12. By applying Corollary 13, we can also have

$$\|\Theta_{j+1}^i - \tilde{\Theta}_{j+1}^i\|_F \leq 2\eta\Delta\sqrt{k_\Delta}, \quad \|\Theta_{j+1}^i - \tilde{\Theta}_{j+1}^i\|_F^2 \leq 2\eta^2\Delta^2k_\Delta$$

which further implies

$$\begin{aligned} \|\Theta_{j+1}^i - \Theta^*\|_F^2 &= \|\Theta_{j+1}^i - \tilde{\Theta}_{j+1}^i\|_F^2 + \|\tilde{\Theta}_{j+1}^i - \Theta^*\|_F^2 + 2\langle \Theta_{j+1}^i - \tilde{\Theta}_{j+1}^i, \tilde{\Theta}_{j+1}^i - \Theta^* \rangle \\ &\leq \|\tilde{\Theta}_{j+1}^i - \Theta^*\|_F^2 + 4\sqrt{k_\Delta}\eta\sqrt{k_\Delta}\Delta + 2k_\Delta\eta^2\Delta^2 \\ &= \|\tilde{\Theta}_{j+1}^i - \Theta^*\|_F^2 + \sigma_{\Delta|SVRG}^2 \end{aligned}$$

The last equality defines  $\sigma_{\Delta|SVRG}^2$ . To bound  $\|\tilde{\Theta}_{j+1}^i - \Theta^*\|_F^2$ , the high level idea is similar to the proof of Theorem 10 in [26]. We first define,

$$\mathbf{Z}_{j+1}^i = \Theta_j^i - \eta \mathbf{G}_j^i$$

Let  $\Omega = \text{supp}(\Theta_j^i) \cup \text{supp}(\tilde{\Theta}_{j+1}^i) \cup \text{supp}(\Theta^*)$ ,

$$\|\tilde{\Theta}_{j+1}^i - \Theta^*\|_F^2 = \|\mathcal{H}_k(\mathbf{Z}_{j+1}^i) - \Theta^*\|_F^2 = \|\mathcal{H}_k(\mathcal{P}_\Omega(\mathbf{Z}_{j+1}^i)) - \Theta^*\|_F^2 \leq \nu \|\mathcal{P}_\Omega(\mathbf{Z}_{j+1}^i) - \Theta^*\|_F^2$$

where the last inequality follows from Lemma 9. Thus we have

$$\begin{aligned} &\mathbb{E}_{b_j} \left[ \|\tilde{\Theta}_{j+1}^i - \Theta^*\|_F^2 \right] \\ &\leq \mathbb{E}_{b_j} \left[ \nu \|\mathcal{P}_\Omega(\mathbf{Z}_{j+1}^i) - \Theta^*\|_F^2 \right] \\ &= \mathbb{E}_{b_j} \left[ \nu \|\Theta_j^i - \Theta^*\|_F^2 + \nu\eta^2 \|\mathcal{P}_\Omega(\mathbf{G}_j^i)\|_F^2 - 2\nu\eta \langle \Theta_j^i - \Theta^*, \mathbf{G}_j^i \rangle \right] \end{aligned}$$

The second term can be bounded by using Corollary 11 and we can take expectation directly on the third term, since  $\mathbb{E}_{b_j}[\mathbf{G}_j^i] = \nabla F(\Theta_j^i)$ . For brevity, denote  $L = L_{|\Omega|}$ . We then have,

$$\begin{aligned} &\mathbb{E}_{b_j} \left[ \|\tilde{\Theta}_{j+1}^i - \Theta^*\|_F^2 \right] \\ &\leq \nu \|\Theta_j^i - \Theta^*\|_F^2 + 4\nu\eta^2 L_{2k} [F(\Theta_j^i) - F(\Theta^*) + F(\Theta_0^i) - F(\Theta^*)] - 2\nu\eta \langle \Theta_j^i - \Theta^*, \nabla F(\Theta_j^i) \rangle \\ &\quad - 4\nu\eta^2 L_{2k} \langle \nabla F(\Theta^*), \Theta_j^i + \Theta_0^i - 2\Theta^* \rangle + 4\nu\eta^2 \|\mathcal{P}_\Omega(\nabla F(\Theta^*))\|_F^2 \\ &\leq \nu(1 - \eta\alpha_{2k}) \|\Theta_j^i - \Theta^*\|_F^2 - 2\nu\eta(1 - 2\eta L_{2k}) [F(\Theta_j^i) - F(\Theta^*)] + 4\nu\eta^2 L_{2k} [F(\Theta_0^i) - F(\Theta^*)] \\ &\quad + 4\nu\eta^2 L_{2k} \|\nabla F(\Theta^*)\|_F \|\Theta_j^i + \Theta_0^i - 2\Theta^*\|_F + 4\nu\eta^2 \|\mathcal{P}_\Omega(\nabla F(\Theta^*))\|_F^2 \end{aligned}$$

where the first inequality plugs in the result from Corollary 11 and takes expectation of  $\mathbf{G}_j^i$ . The second inequality uses RSC property and Cauchy-Schwartz inequality. For brevity, define  $\sigma' = \max_{|\Omega|=3k+K} \|\mathcal{P}_\Omega \nabla F(\Theta^*)\|_F$ , we have that

$$\begin{aligned} \mathbb{E}_{b_j} \left[ \|\tilde{\Theta}_{j+1}^i - \Theta^*\|_F^2 \right] &\leq \nu(1 - \eta\alpha_{2k}) \|\Theta_j^i - \Theta^*\|_F^2 - 2\nu\eta(1 - 2\eta L_{2k}) [F(\Theta_j^i) - F(\Theta^*)] \\ &\quad + 4\nu\eta^2 L_{2k} [F(\Theta_0^i) - F(\Theta^*)] + 4\nu\eta\sigma'(4L_{2k}\sqrt{k_\Delta} + \sigma') \end{aligned}$$

Thus for  $\mathbb{E}_{b_j} [\|\Theta_{j+1}^i - \Theta^*\|_F^2]$ , we have

$$\begin{aligned} \mathbb{E}_{b_j} [\|\Theta_{j+1}^i - \Theta^*\|_F^2] &\leq \nu(1 - \eta\alpha_{2k}) \|\Theta_j^i - \Theta^*\|_F^2 - 2\nu\eta(1 - 2\eta L_{2k}) [F(\Theta_j^i) - F(\Theta^*)] \\ &\quad + 4\nu\eta^2 L_{2k} [F(\Theta_0^i) - F(\Theta^*)] + 4\nu\eta\sigma'(4L_{2k}\sqrt{k}\omega + \sigma') + \sigma_{\Delta|SVRG}^2 \end{aligned}$$

By a telescope sum, define  $B_t = \{b_1, b_2, \dots, b_t\}$

$$\begin{aligned} \mathbb{E}_{B_t} [\|\Theta_t^i - \Theta^*\|_F^2] &\leq [\nu(1 - \eta\alpha_{2k}) - 1] \sum_{j=0}^{t-1} \|\Theta_{j+1}^i - \Theta^*\|_F^2 + \|\Theta_0^i - \Theta^*\|_F^2 \\ &\quad - 2\nu\eta(1 - 2\eta L_{2k}) \sum_{j=0}^{t-1} [F(\Theta_{j+1}^i) - F(\Theta^*)] \\ &\quad + 4\nu\eta^2 L_{2k} m [F(\Theta_0^i) - F(\Theta^*)] + 4\nu\eta\sigma'(4L_{2k}\sqrt{k}\omega + \sigma')m + m\sigma_{\Delta|SVRG}^2 \\ &= [\nu(1 - \eta\alpha_{2k}) - 1] m \mathbb{E}_{B_t, j'} \|\Theta_0^{i+1} - \Theta^*\|_F^2 + \|\Theta_0^i - \Theta^*\|_F^2 \\ &\quad - 2\nu\eta(1 - 2\eta L_{2k}) \mathbb{E}_{B_t, j'} [F(\Theta_0^{i+1}) - F(\Theta^*)] \\ &\quad + 4\nu\eta^2 L_{2k} m [F(\Theta_0^i) - F(\Theta^*)] + 4\nu\eta\sigma'(4L_{2k}\sqrt{k}\omega + \sigma')m + m\sigma_{\Delta|SVRG}^2 \end{aligned}$$

By using RSC, we have  $\frac{2}{\alpha_{2k}} [F(\Theta_0^i) - F(\Theta^*) - \langle \nabla F(\Theta^*), \Theta_0^i - \Theta^* \rangle] \geq \|\Theta_0^i - \Theta^*\|_F^2$ , thus

$$\begin{aligned} \mathbb{E}_{B_t} [\|\Theta_t^i - \Theta^*\|_F^2] &\leq [\nu(1 - \eta\alpha_{2k}) - 1] m \mathbb{E}_{B_t, j'} \|\Theta_0^{i+1} - \Theta^*\|_F^2 \\ &\quad - 2\nu\eta(1 - 2\eta L_{2k}) \mathbb{E}_{B_t, j'} [F(\Theta_0^{i+1}) - F(\Theta^*)] \\ &\quad + \left( \frac{2}{\alpha_{2k}} + 4\nu\eta^2 L_{2k} m \right) [F(\Theta_0^i) - F(\Theta^*)] \\ &\quad + 4\nu\eta\sigma'(4L_{2k}\sqrt{k}\omega + \sigma')m + \frac{2}{\alpha_{2k}} \sqrt{k}\omega\sigma' + m\sigma_{\Delta|SVRG}^2 \end{aligned}$$

By assumption, we have  $[\nu(1 - \eta\alpha_{2k}) - 1] \leq 0$ . For simplicity, define

$$\sigma_{SVRG} = \frac{4\nu\eta\sigma'(4L_{2k}\sqrt{k}\omega + \sigma')m + \frac{2}{\alpha_{2k}} \sqrt{k}\omega\sigma' + m\sigma_{\Delta|SVRG}^2}{2\nu\eta(1 - 2\eta L_{2k})m}$$

Choosing  $\eta < \frac{1}{2L_{2k}}$ , we have

$$\mathbb{E}_{B_t} [F(\Theta_0^{i+1}) - F(\Theta^*)] \leq \left( \frac{1}{\alpha_{2k}\nu\eta(1 - 2\eta L_{2k})m} + \frac{2\eta L_{2k}}{1 - 2\eta L_{2k}} \right) [F(\Theta_0^i) - F(\Theta^*)] + \sigma_{SVRG}$$

Typically  $m$  is quite large, thus for the condition of convergence, we require that

$$\frac{2\eta L_{2k}}{1 - 2\eta L_{2k}} < 1 \Rightarrow \eta < \frac{1}{4L_{2k}}$$

Define,

$$\kappa_{SVRG} = \frac{1}{\alpha_{2k}\nu\eta(1 - 2\eta L_{2k})m} + \frac{2\eta L_{2k}}{1 - 2\eta L_{2k}}$$

We have the linear convergence given by

$$\mathbb{E}_{B_t} [F(\Theta_0^{i+1}) - F(\Theta^*)] \leq \kappa_{SVRG} [F(\Theta_0^i) - F(\Theta^*)] + \sigma_{SVRG}$$

■

## G Proofs for Appendix D

### G.1 Proof of Lemma 9

*Proof.* We give the proof here for completeness. Also, the proof here is much concise than the original proof in [26] and a related result shown in [14].

$$\begin{aligned} \|\mathcal{H}_k(\mathbf{B}) - \Theta\|_F^2 &= \underbrace{\|\mathcal{P}_{\text{supp}(\mathcal{H}_k(\mathbf{B})) \setminus \text{supp}(\Theta)}(\mathbf{B})\|_F^2}_{\|\mathbf{B}_1\|_F^2} + \underbrace{\|\mathcal{P}_{\text{supp}(\mathcal{H}_k(\mathbf{B})) \cap \text{supp}(\Theta)}(\mathbf{B} - \Theta)\|_F^2}_{\|\mathbf{B}_2 - \Theta_2\|_F^2} \\ &\quad + \underbrace{\|\mathcal{P}_{\text{supp}^c(\mathcal{H}_k(\mathbf{B})) \cap \text{supp}(\Theta)}(\Theta)\|_F^2}_{\|\Theta_3\|_F^2} \end{aligned}$$

On the other hand,

$$\begin{aligned} \|\mathbf{B} - \Theta\|_F^2 &= \underbrace{\|\mathcal{P}_{\text{supp}(\mathcal{H}_k(\mathbf{B})) \setminus \text{supp}(\Theta)}(\mathbf{B})\|_F^2}_{\|\mathbf{B}_1\|_F^2} + \underbrace{\|\mathcal{P}_{\text{supp}(\mathcal{H}_k(\mathbf{B})) \cap \text{supp}(\Theta)}(\mathbf{B} - \Theta)\|_F^2}_{\|\mathbf{B}_2 - \Theta_2\|_F^2} \\ &\quad + \underbrace{\|\mathcal{P}_{\text{supp}^c(\mathcal{H}_k(\mathbf{B})) \cap \text{supp}(\Theta)}(\mathbf{B} - \Theta)\|_F^2}_{\|\mathbf{B}_3 - \Theta_3\|_F^2} + \underbrace{\|\mathcal{P}_{\text{supp}^c(\mathcal{H}_k(\mathbf{B})) \setminus \text{supp}(\Theta)}(\mathbf{B})\|_F^2}_{\|\mathbf{B}_4\|_F^2} \\ \max_{\mathbf{B}, \Theta} \frac{\|\mathcal{H}_k(\mathbf{B}) - \Theta\|_F^2}{\|\mathbf{B} - \Theta\|_F^2} &= \max_{\mathbf{B}, \Theta} \frac{\|\mathbf{B}_1\|_F^2 + \|\mathbf{B}_2 - \Theta_2\|_F^2 + \|\Theta_3\|_F^2}{\|\mathbf{B}_1\|_F^2 + \|\mathbf{B}_2 - \Theta_2\|_F^2 + \|\mathbf{B}_3 - \Theta_3\|_F^2 + \|\mathbf{B}_4\|_F^2} \\ &\leq \max_{\mathbf{B}, \Theta} \frac{\|\mathbf{B}_1\|_F^2 + \|\mathbf{B}_2 - \Theta_2\|_F^2 + \|\Theta_3\|_F^2}{\|\mathbf{B}_1\|_F^2 + \|\mathbf{B}_2 - \Theta_2\|_F^2 + \|\Theta_3\|_F^2 + \|\mathbf{B}_3\|_F^2 - 2\langle \mathbf{B}_3, \Theta_3 \rangle} \\ &\leq \max \left\{ 1, \max_{\mathbf{B}, \Theta} \frac{|\text{supp}(\mathbf{B}_1)| \mathbf{B}_{1, \min}^2 + \|\Theta_3\|_F^2}{|\text{supp}(\mathbf{B}_1)| \mathbf{B}_{1, \min}^2 + \|\Theta_3\|_F^2 + \|\mathbf{B}_3\|_F^2 - 2\langle \mathbf{B}_3, \Theta_3 \rangle} \right\} \\ &\leq \max \left\{ 1, \max_{\mathbf{B}, \Theta} \frac{|\text{supp}(\mathbf{B}_1)| \mathbf{B}_{1, \min}^2 + \|\Theta_3\|_F^2}{|\text{supp}(\mathbf{B}_1)| \mathbf{B}_{1, \min}^2 + \|\Theta_3\|_F^2 + |\text{supp}(\Theta_3)| \mathbf{B}_{1, \min}^2 - 2\mathbf{B}_{1, \min} \|\Theta_3\|_1} \right\} \triangleq \gamma \end{aligned}$$

We determine  $\gamma$  by observing

$$\begin{aligned} \frac{|\text{supp}(\mathbf{B}_1)| \mathbf{B}_{1, \min}^2 + \|\Theta_3\|_F^2}{|\text{supp}(\mathbf{B}_1)| \mathbf{B}_{1, \min}^2 + \|\Theta_3\|_F^2 + |\text{supp}(\Theta_3)| \mathbf{B}_{1, \min}^2 - 2\mathbf{B}_{1, \min} \|\Theta_3\|_1} &\leq \gamma, \quad \forall \mathbf{B}, \Theta \\ \Leftrightarrow (\gamma - 1) \|\Theta_3\|_F^2 - 2\gamma \mathbf{B}_{1, \min}^2 + (\gamma |\text{supp}(\Theta_3)| + (\gamma - 1) |\text{supp}(\mathbf{B}_1)|) \mathbf{B}_{1, \min}^2 &\geq 0, \quad \forall \mathbf{B}, \Theta \\ \Leftrightarrow 4\gamma^2 \mathbf{B}_{1, \min}^2 \leq 4(\gamma - 1) \left[ \gamma + (\gamma - 1) \frac{\text{supp}(\mathbf{B}_1)}{\text{supp}(\Theta_3)} \right] \mathbf{B}_{1, \min}^2 \\ \Leftrightarrow \gamma^2 \leq (\gamma - 1) \left[ \gamma + (\gamma - 1) \frac{1}{\rho} \right] \\ \Leftrightarrow \gamma = 1 + \frac{\rho + \sqrt{(4 + \rho)\rho}}{2}, \quad \text{where } \rho = \frac{\min\{K, p^2 - k\}}{k - K + \min\{K, p^2 - k\}} \end{aligned}$$

■

### G.2 Proof of Corollary 10

*Proof.* Define the auxiliary function

$$g(\Xi) := f(\Xi) - \langle \nabla f(\Theta), \Xi \rangle \quad (6)$$

Notice that the gradient of  $g(\cdot)$  satisfies:

$$\|\nabla g(\Xi) - \nabla g(\Xi')\|_F = \|\nabla f(\Xi) - \nabla f(\Xi')\|_F \leq L_{\|\Xi - \Xi'\|_0} \|\Xi - \Xi'\|_F$$

which implies

$$g(\Xi) - g(\Xi') - \langle \nabla g(\Xi'), \Xi - \Xi' \rangle \leq \frac{L_r}{2} \|\Xi - \Xi'\|_F^2$$

where  $r = |\text{supp}(\Xi - \Xi')|$ . On the other hand,

$$g(\Xi) - g(\Theta) = f(\Xi) - f(\Theta) - \langle \nabla f(\Theta), \Xi - \Theta \rangle \geq 0$$

as long as  $f(\cdot)$  satisfies  $|\text{supp}(\Xi) \cup \text{supp}(\Theta)|$ -RC. Take  $\Xi = \Theta' - \frac{1}{L_{|\Omega|}} \mathcal{P}_\Omega \nabla g(\Theta')$ ,  $\Xi' = \Theta'$ , then,

$$\begin{aligned} g(\Theta) &\leq g(\Theta' - \frac{1}{L_{|\Omega|}} \mathcal{P}_\Omega \nabla g(\Theta')) \\ &\leq g(\Theta') + \left\langle \nabla g(\Theta'), -\frac{1}{L_{|\Omega|}} \mathcal{P}_\Omega \nabla g(\Theta') \right\rangle + \frac{1}{2L_{|\Omega|}} \|\mathcal{P}_\Omega \nabla g(\Theta')\|_F^2 \\ &= g(\Theta') - \frac{1}{2L_{|\Omega|}} \|\mathcal{P}_\Omega \nabla g(\Theta')\|_F^2 \end{aligned}$$

Plug in the definition in Equation (6) gives the result we want. ■

### G.3 Proof of Corollary 11

*Proof.*

1. SGD:

$$\begin{aligned} \mathbb{E}_{\mathcal{B}_t} \|\mathcal{P}_\Omega(\mathbf{G}^t)\|_F^2 &= \mathbb{E}_{\mathcal{B}_t} \|\mathcal{P}_\Omega(\nabla f_{\mathcal{B}_t}(\Theta^{t-1}))\|_F^2 \\ &\leq 2\mathbb{E}_{\mathcal{B}_t} \|\mathcal{P}_\Omega(\nabla f_{\mathcal{B}_t}(\Theta^{t-1}) - \nabla f_{\mathcal{B}_t}(\Theta^*))\|_F^2 + 2\|\mathcal{P}_\Omega(\nabla f_{\mathcal{B}_t}(\Theta^*))\|_F^2 \\ &\leq 2L_{2k}^2 \|\Theta^{t-1} - \Theta^*\|_F^2 + 2\|\mathcal{P}_\Omega(\nabla f_{\mathcal{B}_t}(\Theta^*))\|_F^2 \end{aligned}$$

The first inequality is by algebra, the second inequality holds by RSM.

2. SVRG:

$$\begin{aligned} \|\mathcal{P}_\Omega(\mathbf{G}_j^i)\|_F^2 &= \|\mathcal{P}_\Omega(\nabla f_{b_j}(\Theta_j^i) - \nabla f_{b_j}(\Theta_0^i) + \nabla F(\Theta_0^i))\|_F^2 \\ &\leq 2\|\mathcal{P}_\Omega(\nabla f_{b_j}(\Theta_j^i) - \nabla f_{b_j}(\Theta^*))\|_F^2 \\ &\quad + 2\|\mathcal{P}_\Omega(\nabla f_{b_j}(\Theta_0^i) - \nabla f_{b_j}(\Theta^*) - \nabla F(\Theta_0^i))\|_F^2 \end{aligned}$$

Expand the later square, we have

$$\begin{aligned} \|\mathcal{P}_\Omega(\mathbf{G}_j^i)\|_F^2 &\leq 2\|\mathcal{P}_\Omega(\nabla f_{b_j}(\Theta_j^i) - \nabla f_{b_j}(\Theta^*))\|_F^2 + 2\|\mathcal{P}_\Omega(\nabla f_{b_j}(\Theta_0^i) - \nabla f_{b_j}(\Theta^*))\|_F^2 \\ &\quad + 2\|\mathcal{P}_\Omega \nabla F(\Theta_0^i)\|_F^2 - 4\langle \mathcal{P}_\Omega(\nabla f_{b_j}(\Theta_0^i) - \nabla f_{b_j}(\Theta^*)), \mathcal{P}_\Omega \nabla F(\Theta_0^i) \rangle \end{aligned}$$

By applying Corollary 10 to bound the first two terms, we have

$$\begin{aligned} \|\mathcal{P}_\Omega(\mathbf{G}_j^i)\|_F^2 &\leq 4L_{2k} [f_{b_j}(\Theta_j^i) - f_{b_j}(\Theta^*) - \langle \nabla f_{b_j}(\Theta^*), \Theta_j^i - \Theta^* \rangle] \\ &\quad + 4L_{2k} [f_{b_j}(\Theta_0^i) - f_{b_j}(\Theta^*) - \langle \nabla f_{b_j}(\Theta^*), \Theta_0^i - \Theta^* \rangle] \\ &\quad + 2\|\mathcal{P}_\Omega \nabla F(\Theta_0^i)\|_F^2 - 4\langle \mathcal{P}_\Omega(\nabla f_{b_j}(\Theta_0^i) - \nabla f_{b_j}(\Theta^*)), \mathcal{P}_\Omega \nabla F(\Theta_0^i) \rangle \end{aligned}$$

Taking expectation over  $b_j$ , we have

$$\begin{aligned}
\mathbb{E}_{b_j} \|\mathcal{P}_\Omega(\mathbf{G}_j^i)\|_F^2 &\leq 4L_{2k} [F(\Theta_j^i) - F(\Theta^*)] + 4L_{2k} [F(\Theta_0^i) - F(\Theta^*)] \\
&\quad - 4L_{2k} \left\langle \nabla F(\Theta^*), \Theta_j^i + \Theta_0^i - 2\Theta^* \right\rangle \\
&\quad + 2 \left\langle 2\mathcal{P}_\Omega(\nabla F(\Theta^*)) - \mathcal{P}_\Omega(\nabla F(\Theta_0^i)), \mathcal{P}_\Omega \nabla F(\Theta_0^i) \right\rangle \\
&= 4L_{2k} [F(\Theta_j^i) - F(\Theta^*)] + 4L_{2k} [F(\Theta_0^i) - F(\Theta^*)] \\
&\quad - 4L_{2k} \left\langle \nabla F(\Theta^*), \Theta_j^i + \Theta_0^i - 2\Theta^* \right\rangle \\
&\quad + \|2\mathcal{P}_\Omega(\nabla F(\Theta^*))\|_F^2 - \|2\mathcal{P}_\Omega(\nabla F(\Theta^*) - \nabla F(\Theta_0^i))\|_F^2 \\
&\quad - \|\mathcal{P}_\Omega(\nabla F(\Theta_0^i))\|_F^2 \\
&\leq 4L_{2k} [F(\Theta_j^i) - F(\Theta^*)] + 4L_{2k} [F(\Theta_0^i) - F(\Theta^*)] \\
&\quad - 4L_{2k} \left\langle \nabla F(\Theta^*), \Theta_j^i + \Theta_0^i - 2\Theta^* \right\rangle + 4\|\mathcal{P}_\Omega(\nabla F(\Theta^*))\|_F^2
\end{aligned}$$

■

#### G.4 Proof of Corollary 12

*Proof.* Denote  $\Theta^+ = \mathcal{H}_k(\Theta - \eta\mathbf{G})$ . Define  $\Lambda_{new}$  to be the indices set of  $k$ -largest elements in  $G$  that doesn't belong to  $\text{supp}(\Theta)$ . It can be easily verified that

$$\mathcal{H}_k(\Theta - \eta\mathbf{G}) = \mathcal{H}_k(\Theta - \eta\mathcal{P}_{\text{supp}(\Theta) \cup \Lambda_{new}}(\mathbf{G}))$$

Given that  $|\text{supp}(\Theta)| \leq k$ , by pigeonhole principle, we have  $\Lambda_{new} \subseteq \Lambda_{2k}$ , thus

$$\mathcal{H}_k(\Theta - \eta\mathcal{P}_{\text{supp}(\Theta) \cup \Lambda_{new}}(\mathbf{G})) = \mathcal{H}_k(\Theta - \eta\mathcal{P}_{\text{supp}(\Theta) \cup \Lambda_{2k}}(\mathbf{G}))$$

■

#### G.5 Proof of Corollary 13

*Proof.* Define

$$\Gamma_0 = \text{supp}(\Theta^+) \cap \text{supp}(\tilde{\Theta}^+), \Gamma_1 = \text{supp}(\Theta^+) \setminus \text{supp}(\tilde{\Theta}^+), \Gamma_2 = \text{supp}(\tilde{\Theta}^+) \setminus \text{supp}(\Theta^+)$$

We have that

$$\Theta^+ - \tilde{\Theta}^+ = \mathcal{P}_{\Gamma_1}(\Theta^+) - \mathcal{P}_{\Gamma_2}(\tilde{\Theta}^+)$$

By definition of  $\Theta^+, \tilde{\Theta}^+$ , it is easy to verify that

$$\|\mathcal{P}_{\Gamma_1}(\Theta^+)\|_\infty \leq \|\mathcal{P}_{\Gamma_2}(\tilde{\Theta}^+)\|_\infty$$

Also, since the elements that is greater than  $\eta\Delta$  can only come from  $\text{supp}(\Theta) \cup \Lambda_\Delta$ , and given that  $\Lambda_\Delta \subseteq \tilde{\Lambda}$ , we know that

$$i \in \text{supp}(\Theta^+), \forall i \text{ s.t. } \tilde{\Theta}_i^+ \geq \eta\Delta \Rightarrow i \in \Gamma_0, \forall i \text{ s.t. } \tilde{\Theta}_i^+ \geq \eta\Delta$$

Thus we have

$$\|\mathcal{P}_{\Gamma_2}(\tilde{\Theta}^+)\|_\infty \leq \eta\Delta$$

By Corollary 12, we know that

$$\tilde{\Theta}^+ = \mathcal{H}_k(\Theta - \eta\mathcal{P}_{\Lambda_{2k} \cup \text{supp}(\Theta)}(\mathbf{G}_t))$$

Thus we have  $|\Gamma_2| \leq k_\Delta$  and given that  $|\text{supp}(\Theta^+)| = |\widetilde{\text{supp}}(\Theta^+)|$ , we have  $|\Gamma_1| = |\Gamma_2|$ . Thus,

$$\|\Theta^+ - \tilde{\Theta}^+\|_F = \|\mathcal{P}_{\Gamma_1}(\Theta^+) - \mathcal{P}_{\Gamma_2}(\tilde{\Theta}^+)\|_F \leq \eta\Delta\sqrt{2k_\Delta}$$

■
